1 **The allelic rice immune receptor Pikh confers extended resistance to strains**  
2 **of the blast fungus through a single polymorphism in the effector binding**  
3 **interface**

4 **Short title: Functional convergence of rice NLR alleles towards extended**  
5 **effector recognition**

6 Juan Carlos De la Concepcion<sup>1\*</sup>, Josephine H. R. Maidment<sup>1\*</sup>, Apinya Longya<sup>1,2\*</sup>, Gui  
7 Xiao<sup>1,3,4\*</sup>, Marina Franceschetti<sup>1\*</sup> & Mark J. Banfield<sup>1#</sup>

8 \* These authors contributed equally to this work

9 # Corresponding author: mark.banfield@jic.ac.uk

10 <sup>1</sup> Department of Biological Chemistry, John Innes Centre, Norwich Research Park, Norwich,  
11 NR4 7UH, U.K.

12 <sup>2</sup> Department of Genetics, Faculty of Science, Kasetsart University, Bangkok, 10900, Thailand.

13 <sup>3</sup> State Key Laboratory of Hybrid Rice, Hunan Hybrid Rice Research Center, Changsha,  
14 410125, China.

15 <sup>4</sup> Genetics and Biotechnology Division, International Rice Research Institute, DAPO Box  
16 7777, Metro Manila, Philippines

17

18 ORCIDs:

19 Juan Carlos De la Concepcion: 0000-0002-7642-8375

20 Josephine H. R. Maidment: 0000-0002-8229-2718

21 Apinya Longya: 0000-0001-9054-0374

22 Gui Xiao: 0000-0003-4032-3165

23 Marina Franceschetti: 0000-0002-1389-6825

24 Mark J Banfield: 0000-0001-8921-3835

25 **Abstract**

26 Arms race co-evolution drives rapid adaptive changes in pathogens and in the immune systems  
27 of their hosts. Plant intracellular NLR immune receptors detect effectors delivered by  
28 pathogens to promote susceptibility, activating an immune response that halts colonization. As  
29 a consequence, pathogen effectors evolve to escape immune recognition and are highly  
30 variable. In turn, NLR receptors are one of the most diverse protein families in plants, and this  
31 variability underpins differential recognition of effector variants. The molecular mechanisms  
32 underlying natural variation in effector recognition by NLRs are starting to be elucidated. The  
33 rice NLR pair Pik-1/Pik-2 recognizes AVR-Pik effectors from the blast fungus *Magnaporthe*  
34 *oryzae*, triggering immune responses that limit rice blast infection. Allelic variation in a heavy  
35 metal associated (HMA) domain integrated in the receptor Pik-1 confers differential binding  
36 to AVR-Pik variants, determining resistance specificity. Previous mechanistic studies  
37 uncovered how a Pik allele, Pikm, has extended recognition to effector variants through a  
38 specialized HMA/AVR-Pik binding interface. Here, we reveal the mechanistic basis of  
39 extended recognition specificity conferred by another Pik allele, Pikh. A single residue in Pikh-  
40 HMA increases binding to AVR-Pik variants, leading to an extended effector response in  
41 planta. The crystal structure of Pikh-HMA in complex with an AVR-Pik variant confirmed that  
42 Pikh and Pikm use a similar molecular mechanism to extend their pathogen recognition profile.  
43 This study shows how different NLR receptor alleles functionally converge to extend  
44 recognition specificity to pathogen effectors.

## 45 **Author Summary**

46 Plant pathogens constantly evolve to overcome immune defences and successfully colonize  
47 hosts, resulting in some of the most devastating diseases that affect global food production. To  
48 defend themselves, plants have evolved a sophisticated immune system that recognizes the  
49 presence of different pathogens and triggers immune responses to stop their spread. How plant  
50 immune receptors achieve extended recognition to specific pathogen strains and the molecular  
51 details of this recognition are just starting to be understood.

52 In this study, we characterize how an allele of a rice immune receptor achieves a broad-  
53 spectrum recognition to effectors from the rice blast fungus. We found that this receptor has  
54 evolved a single change that alters the way it binds to different effector variants. This change  
55 increases binding affinity to these variants and this is ultimately translated to immune  
56 recognition. Interestingly, a different rice immune receptor allele also achieves broad-spectrum  
57 effector recognition in a similar way. Therefore, different immune receptor alleles can  
58 converge on a similar mechanism to achieve extended recognition to pathogen effectors.

59 This knowledge has the potential to help to the rational design of plant immune receptors with  
60 bespoke resistance to some of the most destructive pathogens. A long-term goal in plant  
61 biotechnology.

## 62 **Introduction**

63 Plant pathogens cause extensive yield losses in crop harvests worldwide [1]. To ensure  
64 successful colonization, pathogens secrete an arsenal of effector molecules that are delivered  
65 into host cells to circumvent immune defences and manipulate cell processes, ultimately  
66 promoting infection [2]. To counteract these virulence factors, plants have evolved an array of  
67 intracellular immune receptors belonging to the nucleotide-binding, leucine-rich repeat (NLR)  
68 superfamily that can detect pathogen effectors [3]. Upon recognition, NLRs trigger the  
69 activation of immune responses that ultimately lead to localised programmed cell death,  
70 stopping the spread of the pathogen [4, 5].

71 Recognition by immune receptors imposes a strong constraint on pathogens, driving the  
72 evolution of new effector variants that escape immune detection. To match this, NLRs are  
73 present in large and diverse protein families in plants [6, 7], often with discrete recognition  
74 specificity for effector variants [8-10]. As a result, both pathogen effectors and plant NLRs are  
75 under strong selection and present signatures of rapid evolution [11-13].

76 Plant NLRs use diverse mechanisms to recognize pathogen effectors and/or their activities [14,  
77 15]. Multiple plant NLRs harbour non-canonical domains integrated in their architecture. These  
78 integrated domains are thought to mimic host proteins targeted by effectors, and serve as baits  
79 to mediate pathogen detection [14, 16]. The abundance of integrated domains found across  
80 plant genomes suggests that this is an evolutionarily favourable mechanism of pathogen  
81 recognition [17-19]. The discovery of integrated domains in plant NLRs facilitates the  
82 mechanistic study of effector recognition [20-23] and presents new opportunities to engineer  
83 disease resistance [24].

84 The fungus *Magnaporthe oryzae* causes blast disease in rice [25, 26] and other cereal crops  
85 such as barley and wheat [27, 28]. The genome of this pathogen encodes hundreds of putative  
86 effectors [29], some of which are recognized by plant NLRs, leading to disease resistance [30].  
87 Paired NLR receptors harbouring integrated domains are particularly prevalent in rice [31, 32],  
88 and account for some of the most well-characterised resistance genes against rice blast [33].  
89 The effector complement of different blast strains shows signatures of rapid evolution,  
90 including presence/absence polymorphisms [34-37]. This allows the blast pathogen to break  
91 genetic resistance, producing disease outbreaks that threaten food production worldwide [1,  
92 27, 38].

93 AVR-Pik is one of the several rice blast effectors characterized to date [39], and belongs to the  
94 Magnaporthe AVRs and ToxB like (MAX) effector family, whose members share a similar  
95 overall structural scaffold despite divergent sequence [40]. AVR-Pik is recognized in rice by a  
96 pair of genetically linked NLRs, Pik-1 and Pik-2 [33, 41]. The sensor NLR Pik-1 harbours an  
97 integrated heavy metal associated (HMA) domain that directly binds AVR-Pik triggering  
98 immune responses [20, 21]. In contrast to other blast effectors such as AVR1-CO39 and AVR-  
99 Pii, which present presence/absence polymorphisms in blast genomes [34, 35, 42], AVR-Pik  
100 displays signatures of positive selection, and occurs as multiple effector variants [39, 43]. To  
101 date, six AVR-Pik variants (A to F) have been described [39, 44]. Polymorphisms in these  
102 variants affect their binding to the Pik-HMA domain and can lead to escape from Pik detection  
103 [20, 21, 45].

104 Pik NLRs exist as an allelic series across rice cultivars. Five different Pik alleles, Pikh, Pikip,  
105 Pikm, Piks and Pik\* have been described based on their differential response profiles to blast  
106 strains [45-49]. The emergence of these Pik alleles has been proposed to follow a linear  
107 progression from narrow to broad recognition spectrum (Piks/Pikip  $\rightarrow$  Pik\*  $\rightarrow$  Pikm/Pikh),  
108 driven by co-evolution with AVR-Pik variants [33, 43, 45]. Interestingly, none of the Pik alleles  
109 mediate resistance to blast strains harbouring AVR-PikC or AVR-PikF [44, 45].  
110 Polymorphisms that define the allelic diversity of Pik NLRs are located within the HMA  
111 domain, with which the effector interacts [45, 50]. Ultimately, recognition specificity is  
112 underpinned by modifications in the HMA binding interface that determine binding to AVR-  
113 Pik effectors [20].

114 The differential recognition of AVR-Pik between Pikip (narrow-spectrum) and Pikm (broad-  
115 spectrum) is defined at the structural level via three binding interfaces [20]. Whereas Pikip-  
116 HMA interface 2 confers efficient binding and recognition of AVR-PikD, Pikm-HMA interface  
117 3 supports extended effector recognition to AVR-PikD, AVR-PikE and AVR-PikA [20].  
118 Furthermore, incorporating the Pikm-HMA interface 3 into Pikip (Pikip<sup>NK-KE</sup>) extended the  
119 binding affinity and recognition profile of Pikip to AVR-PikE and AVR-PikA [24]. Together,  
120 these results suggest that Pik alleles have separately evolved distinct molecular mechanisms to  
121 ensure efficient effector recognition. Supporting this, HMA domains from allelic Pik receptors  
122 cluster into two phylogenetically distinct groups (Bootstrap = 100) that contain either cultivar  
123 K60 or Tsuyuake, which harbour Pikip and Pikm resistance, respectively (**Figure 1a**,  
124 **Supplementary Figure 1**) [50]. Each group comprises alleles with narrow and broad

125 recognition specificities to different AVR-Pik variants [45] (**Figure 1b**), suggesting that  
126 diverse Pik alleles have separately evolved broader recognition to AVR-Pik variants.

127 The Pikh allele, present in rice cultivar K3, displays extended recognition of rice blast fungus  
128 isolates carrying different AVR-Pik variants [43, 45, 50]. Pikh clusters in the same  
129 phylogenetic group as the narrow-spectrum allele Pikip (**Figure 1a, b**). However, the disease  
130 resistance profile of rice cultivar K3 (Pikh) is similar to Tsuyuake (Pikm) [45] (**Figure 1b**).  
131 The only polymorphism between Pikip and Pikh, Asn261Lys, maps to the HMA domain and is  
132 contained within binding interface 3 (**Supplementary Figure 1**). This is the region that  
133 underpins extended pathogen recognition in Pikm [20], and is one of the mutations previously  
134 shown to extend AVR-Pik recognition profile when introduced in Pikip [24].

135 Here, we show that the single amino acid polymorphism Asn261Lys in Pikh-HMA increases  
136 the binding affinity to AVR-Pik effectors, underpinning the extended recognition of Pikh to  
137 AVR-Pik variants. The crystal structure of Pikh-HMA bound to AVR-PikC shows that the  
138 Asn261Lys polymorphism in Pikh introduces a Pikm-like interface 3 to aid effector binding.  
139 These results demonstrate that Pikh and Pikm have independently converged towards a similar  
140 molecular mechanism to confer broad-spectrum resistance to blast strains.

## 141 **Results**

### 142 **Pikh-1/Pikh-2 mediate an extended response to rice blast AVR-Pik effector variants in *N.*** 143 ***benthamiana***

144 *N. benthamiana* is a well-established model system to monitor Pik-mediated cell death in  
145 response to AVR-Pik effectors following transient expression via agroinfiltration [20, 21, 24].  
146 We used this system to explore the extended recognition specificity to AVR-Pik effector  
147 variants observed for Pikh in rice [45]. For this, we co-expressed Pikh-1 and Pikh-2 (which is  
148 100% identical to Pikip-2) in *N. benthamiana* with either AVR-PikD, AVR-PikE, AVR-PikA  
149 or AVR-PikC (**Figure 1c**). We co-expressed Pikh-1/Pikh-2 with empty vector as a negative  
150 control, and Pikip-1/Pikip-2 and AVR-PikD as a positive control (**Figure 1c**).

151 In this assay, Pikh shows a robust cell death response to AVR-PikD, a weak response to AVR-  
152 PikE, but no response to AVR-PikA or AVR-PikC (comparable to the negative control (**Figure**  
153 **1c,d**)). The expression of each protein was confirmed by western blot (**Supplementary Figure**  
154 **2**). These results show that Pikh has an extended response to AVR-Pik effectors in *N.*  
155 *benthamiana* compared to Pikip, but not to the same extent as previously seen for Pikm [20].

156

### 157 **The Pikh-HMA domain binds to AVR-Pik effectors more strongly than Pikip-HMA**

158 We sought to determine whether the extended recognition mediated by Pikh to strains of *M.*  
159 *oryzae* [43, 45, 50] correlates with an increase in binding of the Pikh-HMA to the AVR-Pik  
160 effector variants.

161 First, we tested the interaction of Pikh-HMA with AVR-Pik variants by yeast-2-hybrid (Y2H),  
162 using Pikip-HMA for comparison (**Figure 2a**). As previously reported, Pikip-HMA interacted  
163 with AVR-PikD (depicted by yeast growth and development of blue coloration), while AVR-  
164 PikE and AVR-PikA show reduced interaction (**Figure 2a**) [20, 24]. For Pikh-HMA, we  
165 observed a similar interaction with AVR-PikE and an increase in the interaction with AVR-  
166 PikA, compared to Pikip-HMA (**Figure 2a**), which was more pronounced after a longer  
167 incubation period (**Supplemental figure 3**). Interestingly, Pikh-HMA displayed interaction  
168 with AVR-PikC in this assay (**Figure 2a, Supplemental figure 3**), but neither Pikip-HMA nor  
169 Pikh-HMA displayed any interaction with AVR-PikF. The expression of each protein in yeast  
170 was confirmed by western blot (**Supplemental Figure 4**).

171 Next, we expressed and purified P<sub>ikp</sub>-HMA and P<sub>ikh</sub>-HMA domains, and the AVR-P<sub>ik</sub>  
172 variants, in *E. coli* using established protocols as described in the **Materials and Methods** [20,  
173 21, 24]. We used surface plasmon resonance (SPR) to quantitatively measure and compare  
174 protein binding [51] (**Figure 2b, Supplemental Figure 5**). We captured each AVR-P<sub>ik</sub> variant  
175 onto a Biacore NTA chip via a hexahistidine tag at the C-terminus of the effector. Then, we  
176 injected either P<sub>ikp</sub>-HMA or P<sub>ikh</sub>-HMA at three different concentrations (4 nM, 40 nM and  
177 100 nM), recording the binding level in Response Units (RUs). RUs were then normalised to  
178 the theoretical maximum response ( $R_{max}$ ) as described in [51], assuming a 2:1 (P<sub>ik</sub>-  
179 HMA:AVR-P<sub>ik</sub>) interaction model. This assay showed an increased binding of P<sub>ikh</sub>-HMA to  
180 all the AVR-P<sub>ik</sub> effectors in vitro, compared with P<sub>ikp</sub>-HMA (**Figure 2b, Supplemental**  
181 **Figure 5**). This further confirmed the interaction between P<sub>ikh</sub>-HMA and AVR-P<sub>ikC</sub> observed  
182 in Y2H (**Figure 2a, b**) and, although we did not observe interaction by Y2H, we also detect  
183 binding between P<sub>ikh</sub>-HMA and AVR-P<sub>ikF</sub> by SPR (**Figure 2b, Supplemental Figure 5**).

184 Together, the Y2H and SPR results show that P<sub>ikh</sub>-HMA displays increased binding to AVR-  
185 P<sub>ik</sub> effector variants compared to P<sub>ikp</sub>-HMA in vitro. This partially correlates with the  
186 extended recognition specificity displayed by the rice cultivar K3 harbouring P<sub>ikh</sub> [45]  
187 (**Figure 1b**) and, to a lesser extent, with the cell death assays in *N. benthamiana* (**Figure 1c, d**).  
188 As the only difference between the P<sub>ikp</sub> and P<sub>ikh</sub> HMA domains is the single amino acid  
189 polymorphism Asn261Lys (**Supplemental Figure 1**), this amino acid must underpin the  
190 increase in effector binding.

191

## 192 **The increased binding of P<sub>ikh</sub>-HMA to AVR-P<sub>ik</sub> variants results in an extended effector** 193 **association in planta**

194 Previous studies have shown that P<sub>ik</sub>-HMA domain binding to AVR-P<sub>ik</sub> in yeast and in vitro  
195 may not always directly correlate with pathogen recognition by the host, most likely due to  
196 lacking the context of the full-length receptor and conditions of the plant cell [20, 24].  
197 Therefore, we investigated the association between full-length P<sub>ikh</sub>-1 and AVR-P<sub>ik</sub> effectors  
198 in planta. For this, we co-expressed either P<sub>ikp</sub>-1 or P<sub>ikh</sub>-1 with each of the AVR-P<sub>ik</sub> variants  
199 in *N. benthamiana*. P<sub>ik</sub>-1 proteins were subsequently immunoprecipitated and effector  
200 association was determined by western blot (**Figure 3**).

201 As previously reported, P<sub>ikp</sub>-1 robustly associates with AVR-P<sub>ikD</sub>, as shown by the signal in  
202 the co-IP blot developed with  $\alpha$ -Myc tag, but not with AVR-P<sub>ikE</sub> or AVR-P<sub>ikA</sub> (**Figure 3**)



203 [24]. For Pikh-1, we observe a stronger association of full-length Pikh-1 to AVR-PikE and  
204 AVR-PikA compared to Pikip-1 (**Figure 3**). Furthermore, the association levels of AVR-PikD,  
205 AVR-PikE and AVR-PikA follow the trend of cell death in *N. benthamiana* (**Figure 1c, d**).  
206 Although Pikh-HMA interacts with AVR-PikC and AVR-PikF in vitro, we found no  
207 association between full-length Pikh-1 and either of these effector variants in this assay (**Figure**  
208 **3**).

209 These results suggest that the increased binding of Pikh-HMA to effector variants extends the  
210 association of the full-length Pikh-1 receptor to AVR-PikE and AVR-PikA in planta. This  
211 correlates with the recognition specificity displayed by rice cultivars harbouring the Pikh allele  
212 [45].

213

### 214 **A single polymorphism at the Pikh-HMA effector-binding interface underpins the** 215 **increased binding to AVR-Pik effectors**

216 To gain a mechanistic understanding of how the Pikh Asn261Lys polymorphism increases the  
217 association of the receptor with AVR-Pik effectors, we determined the crystal structure of Pikh-  
218 HMA in complex with AVR-PikC.

219 The complex of Pikh-HMA bound to AVR-PikC was co-expressed and purified from *E. coli*  
220 using established protocols [20, 24]. The complex was subsequently crystallised and X-ray  
221 diffraction data were collected at the Diamond Light Source (Oxford, UK) to 2.3 Å resolution.  
222 Details of protein complex purification, crystallization, data collection, structure solution and  
223 model refinement are given in the **Materials and Methods** and **Supplemental Table 1**.

224 Although this is the first structure of an HMA domain in complex with an effector allele not  
225 recognised by any known Pik receptor in rice (AVR-PikC), the overall architecture of the  
226 complex is very similar to other HMA/AVR-Pik complexes (RMSD of 0.70 Å when  
227 superimposed upon the structure of Pikip-HMA/AVR-PikE, PDB: 6G11) [20, 21, 24]  
228 (**Supplemental Figure 6, Supplemental Table 2**).

229 The polymorphic Asn261Lys is located at the previously described interface 3 [20]. The Pikh-  
230 Lys261 residue forms intimate contacts within a pocket formed by AVR-PikC residues Glu53,  
231 Tyr71, Ser72 and Trp74 (**Figure 4, middle**). The position of Lys261 results in a different  
232 conformation for the C-terminal region of Pikh-HMA, compared to Pikip-HMA in complex  
233 with AVR-PikE (**Figure 4, left**). However, this conformation is similar to that observed in

234 Pikm-HMA in complex with multiple AVR-Pik effectors. This conformation is thought to  
235 extend Pikm recognition to different AVR-Pik variants [20] (**Figure 4, right, Supplemental**  
236 **Figure 7**).

237 Altogether, the analysis of the Pikh-HMA/AVR-PikC crystal structure confirms that the single  
238 polymorphism Asn261Lys alters the interactions at the HMA/AVR-Pik interface. Further, this  
239 data showed that Pikh shares a similar molecular mechanism to extend recognition to AVR-  
240 Pik variants with Pikm.

241

### 242 **The polymorphic Asp67 residue in AVR-PikC disrupts hydrogen bonding between AVR-** 243 **PikC and the HMA domain**

244 To date, there are no reported Pik NLR alleles that confer resistance to rice blast strains carrying  
245 AVR-PikC [45]. This effector variant differs from AVR-PikE by a single polymorphism,  
246 Ala67Asp, located at the binding interface with the receptor [20, 39]. This polymorphism  
247 reduces AVR-PikC binding to Pik-HMA domains and abrogates immune recognition by Pik  
248 NLRs [20, 45]. As Pikh-HMA interacts with AVR-PikC in vitro with sufficient affinity to allow  
249 co-crystallisation, we were able to investigate the structural basis of how AVR-PikC evades  
250 immune recognition.

251 In the crystal structure of the Pikip-HMA/AVR-PikE complex, the side chain of Asp224 (Pikip-  
252 HMA) forms two hydrogen bonds with the side chain of Arg64 (AVR-PikE) (**Figure 5, left**)  
253 [20, 24]. By contrast, in the structure of Pikh-HMA/AVR-PikC, the sidechain of Asp67 extends  
254 towards the HMA, and the nearby loop containing Asp224 is shifted away from the effector,  
255 likely as a consequence of steric clash and/or repulsion due to the matching charges of the two  
256 side chains. As a result, there are no hydrogen bonds formed between Asp224 of Pikh-HMA  
257 and Arg64 of AVR-PikC (**Figure 5, right**). Instead, the side chain of Arg64 forms an  
258 intramolecular hydrogen bond with the side chain of Asp67. We propose that disruption of  
259 hydrogen bonding network at this interface accounts for the lower binding affinity of Pik-HMA  
260 domains for AVR-PikC, and the lack of recognition of this effector by Pik NLR proteins in  
261 rice.

262

263

264 **Pikh has a similar effector binding and recognition profile to the engineered NLR Pikh<sup>NK-</sup>**  
265 **KE**

266 Based on the structures of Pikh-HMA with AVR-Pik variants, we previously identified a  
267 mutant of Pikh, named Pikh<sup>NK-KE</sup>, that extended binding and recognition of this NLR [24].  
268 Interestingly, the Asn261Lys polymorphism found in Pikh is the same as the first position of  
269 this double mutant. To better understand the extended recognition phenotype displayed by  
270 these NLRs, we compared the Pikh natural variant with the engineered Pikh<sup>NK-KE</sup>.

271 First, we compared the binding of both Pikh-HMA and Pikh-HMA<sup>NK-KE</sup> to AVR-Pik variants  
272 in vitro (**Figure 6a, Supplemental figure 8**). We used SPR to quantitatively measure the  
273 binding of Pikh-HMA<sup>NK-KE</sup> to the AVR-Pik variants and compared this with the binding to  
274 Pikh-HMA measured above (**Figure 6a, Supplemental Figure 8**). As previously reported,  
275 Pikh-HMA<sup>NK-KE</sup> showed increased binding to all the AVR-Pik effectors compared with Pikh-  
276 HMA, including to AVR-PikC [24]. We also extended this analysis to AVR-PikF and found a  
277 similar binding affinity as for AVR-PikC (**Figure 6a, Supplemental Figure 8**). Overall, the  
278 binding levels of Pikh-HMA<sup>NK-KE</sup> to each of the AVR-Pik effectors were very similar to Pikh-  
279 HMA (**Figure 6a, Supplemental Figure 8**).

280 We then performed cell death assays in *N. benthamiana* to compare the extent of the immune  
281 response of Pikh and Pikh<sup>NK-KE</sup> to AVR-PikD, AVR-PikE and AVR-PikA (**Figure 6b, c**). For  
282 this, we transiently co-expressed Pikh-1 or Pikh-1<sup>NK-KE</sup> with Pikh-2 and each of the effectors  
283 side-by-side, measuring the cell death response under UV light after 5 days (**Figure 6b, c**).  
284 Pikh<sup>NK-KE</sup> displayed a clear cell death response to AVR-PikD, AVR-PikE and AVR-PikA with  
285 hierarchical levels in the order AVR-PikD > AVR-PikE > AVR-PikA (**Figure 6b, c**) [24],  
286 consistent with the binding level of the effectors to the HMA domain (**Figure 6a,**  
287 **Supplemental Figure 8**) [24]. As reported above, Pikh also shows a weak cell death response  
288 to AVR-PikE and, in this experiment, to some extent to AVR-PikA (**Figure 1c, d; Figure 6b,**  
289 **c**). The intensity of Pikh mediated responses in *N. benthamiana* were consistently lower  
290 compared to the responses mediated by Pikh<sup>NK-KE</sup> to each AVR-Pik variant (**Figure 6b, c,**  
291 **Supplemental Figure 9**). Similar protein accumulation levels were confirmed by western blot  
292 (**Supplementary Figure 10**).

293 Altogether, these results confirm that the natural polymorphism Asn261Lys in Pikh extends  
294 binding and, to some extent, response to AVR-Pik effectors, confirming the results found in  
295 the previously characterized Pikh<sup>NK-KE</sup> mutant, which includes the same mutation [24].

296 Furthermore, the side-by-side comparison of cell death responses showed that the additional  
297 mutation Lys262Glu in the engineered receptor  $\text{Pikp}^{\text{NK-KE}}$  contributes to enhance cell death  
298 responses, without affecting the strength of binding to the AVR-Pik effector.

## 299 Discussion

300 The interplay between pathogen effectors and intracellular immune receptors is one of the most  
301 striking examples of arms race co-evolution, and has major biological consequences [11, 52-  
302 54]. As their life cycles are commonly far more rapid than the host, pathogens tend to evolve  
303 more quickly, producing devastating effects in global agriculture [55]. Therefore,  
304 understanding the molecular mechanisms of arms race co-evolution between plants and  
305 pathogens has major implications for the development of novel approaches to disease  
306 resistance.

307 Intracellular immune receptors commonly display a narrow recognition specificity to pathogen  
308 effectors. Interestingly, NLRs often occur as allelic series with differential effector recognition  
309 profiles, which can be governed by direct interaction between the receptor and the pathogen  
310 effector. For example, the disease resistance locus *Mla* encodes allelic NLRs that detect  
311 sequence-unrelated effectors from the fungal pathogen *Blumeria graminis f. sp. hordei* (Bgh)  
312 [10]. This recognition is mediated by direct interaction [8] which is likely imposing positive  
313 selection in the receptor, driving functional diversification [56]. A similar effect can be found  
314 in NLRs with integrated domains, as these directly engage with effectors and mediate pathogen  
315 recognition. In the case of the *Pik* locus, the integrated *Pik-HMA* is the most polymorphic  
316 domain [50]. This variation underpins allelic specificity in effector recognition [20] and is  
317 likely driven by arms-race co-evolution with the pathogen effector [45]. A linear step-wise  
318 model has previously been proposed to illustrate the co-evolutionary dynamics between AVR-  
319 *Pik* effectors and *Pik* resistance alleles [33, 43, 45]. However, interactions between the allelic  
320 AVR-*Pik*/*Pik* interactions are more complex, possibly involving differential co-evolution  
321 between allelic receptors and their cognate effector variants [20].

322 Two AVR-*Pik* variants, AVR-*PikC* and AVR-*PikF*, evade recognition by all *Pik* alleles  
323 characterized to date. The polymorphisms defining each of these effectors indicates that they  
324 have separately emerged from AVR-*PikE* and AVR-*PikA*, respectively [39, 44, 45]. Therefore,  
325 there are at least two branches in the evolution of AVR-*Pik* effectors towards evasion of *Pik*-  
326 mediated immunity. Similarly, the *Pik* NLR alleles fall in two phylogenetically distinct groups  
327 based on their HMA domains. As each group contains members displaying narrow- and broad-  
328 spectrum recognition of AVR-*Pik* alleles, it is likely that extended AVR-*Pik* recognition  
329 phenotypes have evolved separately. This is consistent with previous studies showing that *Pikp*  
330 and *Pikm-HMA* domains use different interfaces to efficiently bind AVR-*Pik* effectors [20].

331 However, it is intriguing to note that Pikm and Pikh appear to have convergently evolved  
332 towards the same molecular mechanism to extend effector recognition specificity, by having a  
333 lysine residue one position towards the N-terminus in their protein sequence, compared with  
334 the narrow-spectrum allele Pikp. This was also the outcome of the Pikp-1<sup>NK-KE</sup> mutation to  
335 artificially extend the recognition spectrum of Pikp through structure-guided engineering [24].  
336 Having a shared polymorphism in a natural (Pikh) and engineered (Pikp-1<sup>NK-KE</sup>) NLR towards  
337 expanded effector recognition is perhaps not surprising. This exemplifies how protein  
338 engineering approaches can be informed by natural variation in NLR immune receptors, and  
339 highlights how polymorphisms that enhance disease resistance can be found in the germplasm  
340 of both elite crop varieties and wild relatives [57, 58]. Indeed, mining and characterization of  
341 the allelic diversity of integrated domains has the potential to reveal new sources of resistance.

342 Comparison of the Pikh-HMA and Pikp<sup>NK-KE</sup>-HMA binding to AVR-Pik effectors in vitro and  
343 Pikh- and Pikp<sup>NK-KE</sup>-mediated cell death responses in vivo shows that the engineered variant  
344 has the potential to perform better in conferring disease resistance in rice as it displays  
345 enhanced response in *N. benthamiana*. To date though, it is unknown whether Pikp<sup>NK-KE</sup>  
346 confers a resistance profile to blast strains in rice similar to Pikh [45]. However, these data  
347 support the hypothesis that engineering integrated domains of NLR proteins can be used to  
348 deliver resistance in crops. But why does the presence of a Glu residue (Pikp<sup>NK-KE</sup>), rather than  
349 a Lys residue (Pikh), at position 262 enhance Pik NLR activity? Previous structural studies  
350 showed that the side chain of Glu262 is directed away from the binding interface with the  
351 effector [24], and would not be expected to influence interaction directly. This is supported by  
352 results from SPR experiments presented here (**Figure 6a, Supplemental Figure 8**). Therefore,  
353 Lys262Glu may affect the activation of Pikp-1<sup>NK-KE</sup> through a mechanism downstream of  
354 effector binding. The CC-NLR ZAR1 has recently been shown to oligomerize and form  
355 resistosomes upon activation [59]. Given the presence of a MADA motif in the CC domains of  
356 ZAR1 and the helper NLR Pik-2, we hypothesise that Pik-2 may use a similar mechanism to  
357 trigger cell death in plant cells [60]. Thus, the integrated HMA domain of Pik-1 may make intra  
358 and/or intermolecular interactions with other domains in the sensor or helper NLR. Indeed, the  
359 integrated WRKY domain present in the Arabidopsis NLR RRS1 has been shown to regulate  
360 NLR activation through association with other domains of the NLR [61]. This could explain  
361 how polymorphisms that do not alter the strength of effector binding can influence the outcome  
362 of immune responses. However, little is known about the intra- and intermolecular interactions  
363 that translate effector binding into activation of cell death in the Pik NLR pair.

364 Polymorphisms in effectors that evade detection by plant immune systems provide a selective  
365 advantage to the pathogen. To date, there are two alleles of AVR-Pik that are not recognised  
366 in rice by any naturally occurring Pik variant, AVR-PikC and AVR-PikF [44, 45]. AVR-PikC  
367 differs from AVR-PikE by a single polymorphism, Ala67Asp. Despite the fact that AVR-PikC  
368 is not recognised by Pikh in planta, we were still able to form a Pikh-HMA/AVR-PikC complex  
369 in vitro and obtain its crystal structure. This revealed that the Ala67Asp change disrupts an  
370 intermolecular hydrogen bonding network, likely showing how AVR-PikC escapes recognition  
371 by Pik. This information will inform future engineering efforts to develop Pik receptors that  
372 confer disease resistance to blast isolates containing currently unrecognized effector alleles.  
373 For example, such efforts could use Pikip<sup>NK-KE</sup> or Pikh as a scaffold, adding additional mutations  
374 that further enhance binding to AVR-Pik effectors and lead to broader resistance to blast  
375 disease in rice.

376 **Accession codes**

377 Structure of Pikh-HMA/AVR-PikC, and the data used to derive this, have been deposited at  
378 the Protein DataBank (PDB) with accession code 7A8X.

379 **Acknowledgements**

380 This work was supported by the UKRI Biotechnology and Biological Sciences Research  
381 Council (BBSRC) Norwich Research Park Biosciences Doctoral Training Partnership,  
382 UK [grant BB/M011216/1]; the UKRI BBSRC, UK [grants BB/P012574, BB/M02198X]; the  
383 European Research Council [ERC; proposal 743165]; the John Innes Foundation; The Thailand  
384 Research Fund through The Royal Golden Jubilee Ph.D. Program [PHD/0152/2556]. We  
385 would like to thank Andrew Davies and Phil Robinson from JIC Scientific Photography for the  
386 UV pictures of the cell death assays, Professor Dan MacLean from the Sainsbury Laboratory  
387 (Norwich, UK) Bioinformatics Team for advice on statistical analysis, Dr. Clare Stevenson and  
388 Professor David Lawson from the JIC crystallography platform for technical support in protein  
389 crystallization and X-ray data collection. We also thank Professor Sophien Kamoun for  
390 discussions.



## 391 **Materials and Methods**

### 392 **Gene cloning**

393 For in vitro studies, Pikh-HMA (encompassing residues 186 to 263) was generated by  
394 introducing the Asn262Lys mutation in Pikip-HMA by site-directed mutagenesis, followed by  
395 cloning into pOPIN-M [62]. Wild-type Pikip-HMA, Pikip-HMA<sup>NK-KE</sup>, and AVR-Pik expression  
396 constructs used in this study are as described in [20, 24].

397 For Y2H, we cloned Pikh-HMA into pGBKT7 using In-Fusion cloning (Takara Bio USA),  
398 following the manufacturer's protocol. Wild-type Pikip-HMA domain in pGBKT7 and AVR-  
399 Pik effector variants in pGADT7 used were generated as described in [20]. The *M. oryzae*  
400 effector AVR-PikF was cloned into pGADT7 using In-fusion cloning as described above.

401 For protein expression in planta, the Pikh-HMA domain was generated by introducing the  
402 mutation in a reverse primer for PCR. This domain was then assembled into a full-length NLR  
403 construct using Golden Gate cloning [63] and into the plasmid pICH47742 with a C-terminal  
404 6xHis/3xFLAG tag. Expression was driven by the *A. tumefaciens* Mas promoter and  
405 terminator. Full-length Pikip-1, Pikip-2, and AVR-Pik variants used were generated as described  
406 in [20, 44].

407 All DNA constructs were verified by sequencing.

### 408 **Expression and purification of proteins for in vitro binding studies**

409 6xHis-MBP-tagged Pikip-HMA, Pikh-HMA and Pikip-HMA<sup>NK-KE</sup> were produced in *E. coli*  
410 SHuffle cells [64] using the protocol previously described in [20, 24]. Cell cultures were grown  
411 in auto induction media [65] at 30°C for 5 – 7hrs and then at 16°C overnight. Cells were  
412 harvested by centrifugation and re-suspended in 50 mM HEPES pH 7.5, 500 mM NaCl, 50  
413 mM glycine, 5% (vol/vol) glycerol, 20 mM imidazole supplemented with EDTA-free protease  
414 inhibitor tablets (Roche). Cells were sonicated and, following centrifugation at 40000 x g for  
415 30 min, the clarified lysate was applied to a Ni<sup>2+</sup>-NTA column connected to an AKTA Xpress  
416 purification system (GE Healthcare). Proteins were step-eluted with elution buffer (50 mM  
417 HEPES pH 7.5, 500 mM NaCl, 50 mM Glycine, 5% (vol/vol) glycerol, 500 mM imidazole)  
418 and directly injected onto a Superdex 75 26/600 gel filtration column pre-equilibrated 20mM  
419 HEPES pH 7.5, 150 mM NaCl. Purification tags were then removed by incubation with 3C  
420 protease (10 µg/mg fusion protein) overnight at 4°C followed by passing through tandem Ni<sup>2+</sup>-  
421 NTA and MBP Trap HP columns (GE Healthcare). The flow-through was concentrated as

422 appropriate and loaded on a Superdex 75 26/600 gel filtration column for final purification and  
423 buffer exchange into 20 mM HEPES pH 7.5, 150 mM NaCl.

424 AVR-Pik effectors, with a 3C protease-cleavable N-terminal SUMO tag and a non-cleavable  
425 C-terminal 6xHis tag, were produced in and purified from *E. coli* SHuffle cells as previously  
426 described [20, 21, 24]. All protein concentrations were determined using a Direct Detect®  
427 Infrared Spectrometer (Merck).

#### 428 **Co-expression and purification of Pikh-HMA and AVR-PikC for crystallisation**

429 Pikh-HMA was co-expressed with AVR-PikC in *E. coli* SHuffle cells following co-  
430 transformation of pOPIN-M:Pikh-HMA and pOPIN-A:AVR-PikC (which were prepared as  
431 described in [20, 24]). Cells were grown in autoinduction media (supplemented with both  
432 carbenicillin and kanamycin), harvested, and processed as described as above. Protein  
433 concentrations were measured using a Direct Detect® Infrared Spectrometer (Merck).

#### 434 **Crystallization, data collection and structure solution**

435 For crystallization, Pikh-HMA in complex with AVR-PikC was concentrated to ~10 mg/ml  
436 following gel filtration. Sitting drop vapor diffusion crystallization trials were set up in 96 well  
437 plates, using an Oryx nano robot (Douglas Instruments, United Kingdom). Plates were  
438 incubated at 20°C, and crystals typically appeared after 24 - 48 hours. For data collection, all  
439 crystals were harvested from the Morpheus® HT-96 screen (Molecular Dimensions), and snap-  
440 frozen in liquid nitrogen. Crystals used for data collection appeared in Morpheus® HT-96  
441 condition F1 [0.12 M Monosaccharides (0.2M D-Glucose; 0.2M D-Mannose; 0.2M D-  
442 Galactose; 0.2M L-Fucose; 0.2M D-Xylose; 0.2M N-Acetyl-D-Glucosamine); 0.1 M Buffer  
443 system 1 (1 M Imidazole; MES monohydrate (acid)) pH 6.5; 50% v/v Precipitant mix 1 (40%  
444 v/v PEG 500; MME; 20 % w/v PEG 20000)].

445 X-ray data sets were collected at the Diamond Light Source using beamline i04 (Oxford, UK).  
446 The data were processed using the autoPROC pipeline [66] as implemented in CCP4i2 [67].  
447 The structures were solved by molecular replacement with PHASER [68] using the coordinates  
448 of AVR-PikC and a dimer of Pikh-HMA<sup>NK-KE</sup> (PDB: 7A8W) as the model. The final structures  
449 were obtained through iterative cycles of manual rebuilding and refinement using COOT [69]  
450 and REFMAC5 [70], as implemented in CCP4i2 [67]. Structures were validated using the tools  
451 provided in COOT and MOLPROBITY [71].

452

## 453 **Protein-protein interaction: Yeast-2-hybrid analyses**

454 To detect protein–protein interactions between Pikh-HMA and AVR-Pik effectors by Yeast  
455 Two-Hybrid, we used the Matchmaker® Gold System (Takara Bio USA). We generated a  
456 plasmid encoding Pikh-HMA in pGBKT7 and co-transformed it into chemically competent  
457 Y2HGold cells (Takara Bio, USA) with the individual AVR-Pik variants in pGADT7 as  
458 described previously [20, 24]. Single colonies grown on selection plates were inoculated in 5  
459 ml of SD<sup>-Leu-Trp</sup> and grown overnight at 30°C. Saturated culture was then used to make serial  
460 dilutions of OD<sub>600</sub> 1, 10<sup>-1</sup>, 10<sup>-2</sup>, 10<sup>-3</sup>, respectively. 5 µl of each dilution was then spotted on a  
461 SD<sup>-Leu-Trp</sup> plate as a growth control, and on a SD<sup>-Leu-Trp-Ade-His</sup> plate containing X-α-gal (Takara  
462 Bio, USA). Plates were imaged after incubation for 60 - 72 hr at 30°C unless otherwise stated.  
463 Each experiment was repeated a minimum of 3 times, with similar results.

464 To confirm protein expression in yeast, total protein extracts from transformed colonies were  
465 produced by incubating the cells at 95°C for 10 minutes in LDS Runblue® sample buffer.  
466 Samples were centrifuged and the supernatant was subjected to SDS-PAGE gels prior to  
467 western blotting. The membranes were probed with anti-GAL4 DNA-BD (Sigma) for the HMA  
468 domains in pGBKT7 and anti-GAL4 activation domain (Sigma) antibodies for the AVR-Pik  
469 effectors in pGADT7.

## 470 **Protein-protein interaction: Surface plasmon resonance**

471 A detailed protocol of the surface plasmon resonance (SPR) experiments can be found in [51].  
472 In brief, experiments were performed on a Biacore T200 system (GE Healthcare) using an NTA  
473 sensor chip (GE Healthcare). The system was maintained at 25°C, and a flow rate of 30 µl/min  
474 was used. All proteins were prepared in SPR running buffer (20 mM HEPES pH 7.5, 860 mM  
475 NaCl, 0.1% Tween 20). C-terminally 6xHis-tagged AVR-Pik variants were immobilised on the  
476 chip, giving a response of 250 ± 50 RU. The sensor chip was regenerated between each cycle  
477 with an injection of 30 µl of 350 mM EDTA.

478 For all the assays, the level of binding was expressed as a percentage of the theoretical  
479 maximum response ( $R_{max}$ ) normalized to the amount of ligand immobilized on the chip. The  
480 cycling conditions were the same as used in [20, 24]. For each measurement, in addition to  
481 subtracting the response in the reference cell, a further buffer-only subtraction was made to  
482 correct for bulk refractive index changes or machine effects [72]. SPR data was exported and  
483 plotted using R v3.4.3 (<https://www.r-project.org/>) and the function ggplot2 [73]. Each  
484 experiment was repeated 3 times, with each replicate including 3 internal repeats.

## 485 **Protein-protein interaction: In planta co-immunoprecipitation (co-IP)**

486 Transient gene expression in planta for co-IP was performed by delivering T-DNA constructs  
487 with *Agrobacterium tumefaciens* GV3101 strain (C58 (rifR) Ti pMP90 (pTiC58DT-DNA)  
488 (gentR) Nopaline(pSoup-tetR)) into 4-week old *N. benthamiana* plants grown at 22–25°C with  
489 high light intensity. *A. tumefaciens* strains carrying Pikip-1 or Pikh-1 were mixed with strains  
490 carrying the corresponding AVR-Pik effectors, at OD<sub>600</sub> 0.2 each, in agroinfiltration medium  
491 (10 mM MgCl<sub>2</sub>, 10 mM 2-(N-morpholine)-ethanesulfonic acid (MES), pH 5.6), supplemented  
492 with 150 μM acetosyringone. For detection of complexes in planta, leaf tissue was collected 3  
493 days post infiltration (dpi), frozen, and ground to fine powder in liquid nitrogen using a pestle  
494 and mortar. Leaf powder was mixed with 2x weight/volume ice-cold extraction buffer (10%  
495 glycerol, 25 mM Tris pH 7.5, 1 mM EDTA, 150 mM NaCl, 2% w/v PVPP, 10 mM DTT, 1x  
496 protease inhibitor cocktail (Sigma), 0.1% Tween 20 (Sigma)), centrifuged at 4,200 x g/4 °C for  
497 30 min, and the supernatant was passed through a 0.45μm Minisart® syringe filter. The  
498 presence of each protein in the input was determined by SDS-PAGE/western blot. Pik-1 and  
499 AVR-Pik effectors were detected probing the membrane with anti-FLAG M2 antibody  
500 (SIGMA) and anti-c-Myc monoclonal antibody (Santa Cruz), respectively. For  
501 immunoprecipitation, 1.5 ml of filtered plant extract was incubated with 30 μl of M2 anti-  
502 FLAG resin (Sigma) in a rotatory mixer at 4°C. After three hours, the resin was pelleted (800  
503 x g, 1 min) and the supernatant removed. The pellet was washed and resuspended in 1 ml of IP  
504 buffer (10% glycerol, 25 mM Tris pH 7.5, 1 mM EDTA, 150 mM NaCl, 0.1% Tween® 20  
505 (Sigma)) and pelleted again by centrifugation as before. Washing steps were repeated 5 times.  
506 Finally, 30 μl of LDS Runblue® sample buffer was added to the agarose and incubated for 10  
507 min at 70°C. The resin was pelleted again, and the supernatant loaded on SDS-PAGE gels prior  
508 to western blotting. Membranes were probed with anti-FLAG M2 (Sigma) and anti c-Myc  
509 (Santa Cruz) monoclonal antibodies. Each experiment was repeated at least 3 times.

## 510 ***N. benthamiana* cell death assays**

511 *A. tumefaciens* GV3101 (C58 (rifR) Ti pMP90 (pTiC58DT-DNA) (gentR) Nopaline(pSoup-  
512 tetR)) carrying Pikip-1, Pikh-1 or Pikip-1<sup>NK-KE</sup> were resuspended in agroinfiltration media (10  
513 mM MES pH 5.6, 10 mM MgCl<sub>2</sub> and 150 μM acetosyringone) and mixed with *A. tumefaciens*  
514 GV3101 carrying Pikip-2, AVR-Pik effectors, and P19 at OD<sub>600</sub> 0.4, 0.4, 0.6 and 0.1,  
515 respectively. 4-weeks old *N. benthamiana* leaves were infiltrated using a needleless syringe.  
516 Leaves were collected at 5 dpi and photographed under visible and UV light.

## 517 **Cell death scoring: UV autofluorescence**

518 Detached leaves were imaged at 5 dpi from the abaxial side of the leaves for UV fluorescence  
519 images. Photos were taken using a Nikon D4 camera with a 60mm macro lens, ISO set 1600  
520 and exposure ~10secs at F14. The filter is a Kodak Wratten No.8 and white balance is set to  
521 6250 degrees Kelvin. Blak-Ray® longwave (365nm) B-100AP spot light lamps are moved  
522 around the subject during the exposure to give an even illumination. Images shown are  
523 representative of three independent experiments, with internal repeats. The cell death index  
524 used for scoring is as presented previously [21]. Dotplots were generated using R v3.4.3  
525 (<https://www.r-project.org/>) and the graphic package ggplot2 [73]. The size of the centre dot at  
526 each cell death value is directly proportional to the number of replicates in the sample with that  
527 score. All individual data points are represented as dots.

## 528 **Phylogenetic analysis**

529 Multiple sequence alignment of the coding sequences of 17 Pik-HMA domains obtained from  
530 [50] was performed in Clustal Omega [74]. The phylogenetic tree for the Pik-HMA coding  
531 sequences was calculated using the Maximum likelihood method and Tamura-Nei model [75]  
532 in MEGA X [76]. The tree with the highest log likelihood (-596.61) is shown. Initial trees for  
533 the heuristic search were obtained automatically by applying Neighbour-Joining and BioNJ  
534 algorithms to a matrix of pairwise distances estimated using the Maximum Composite  
535 Likelihood (MCL) approach, and then selecting the topology with superior log likelihood  
536 value. A discrete Gamma distribution was used to model evolutionary rate differences among  
537 sites (5 categories +G, parameter = 0.4524). Codon positions included were  
538 1<sup>st</sup>+2<sup>nd</sup>+3<sup>rd</sup>+Noncoding. There were a total of 246 positions in the final dataset. The tree was  
539 represented using Interactive Tree Of Life (iTOL) v4 [77].

## 540 **Statistical analyses**

541 Qualitative cell-death scoring from autofluorescence was analysed using estimation methods  
542 [78] and visualized with estimation graphics using the bestthr R library [79]. All cell-death  
543 scores in samples under comparison were ranked, irrespective of sample. The mean ranks of  
544 the control and test sample were taken and a bootstrap process was begun on ranked test data,  
545 in which samples of equal size to the experiment were replaced and the mean rank calculated.  
546 After 1000 bootstrap samples, rank means were calculated, a distribution of the mean ranks  
547 was drawn and its 2.5 and 97.5 quantiles calculated. If the mean of the control data is outside  
548 of these boundaries, the control and test means were considered to be different.

549 Quantitative  $R_{\max}$  data from SPR assays were analysed by preparing a linear mixed effects  
550 model of sample on SPR. Post-hoc comparisons were performed for sample contrasts using  
551 Tukey's HSD method in the R package nlme [80] and in lsmeans [81].

552 **Figures**

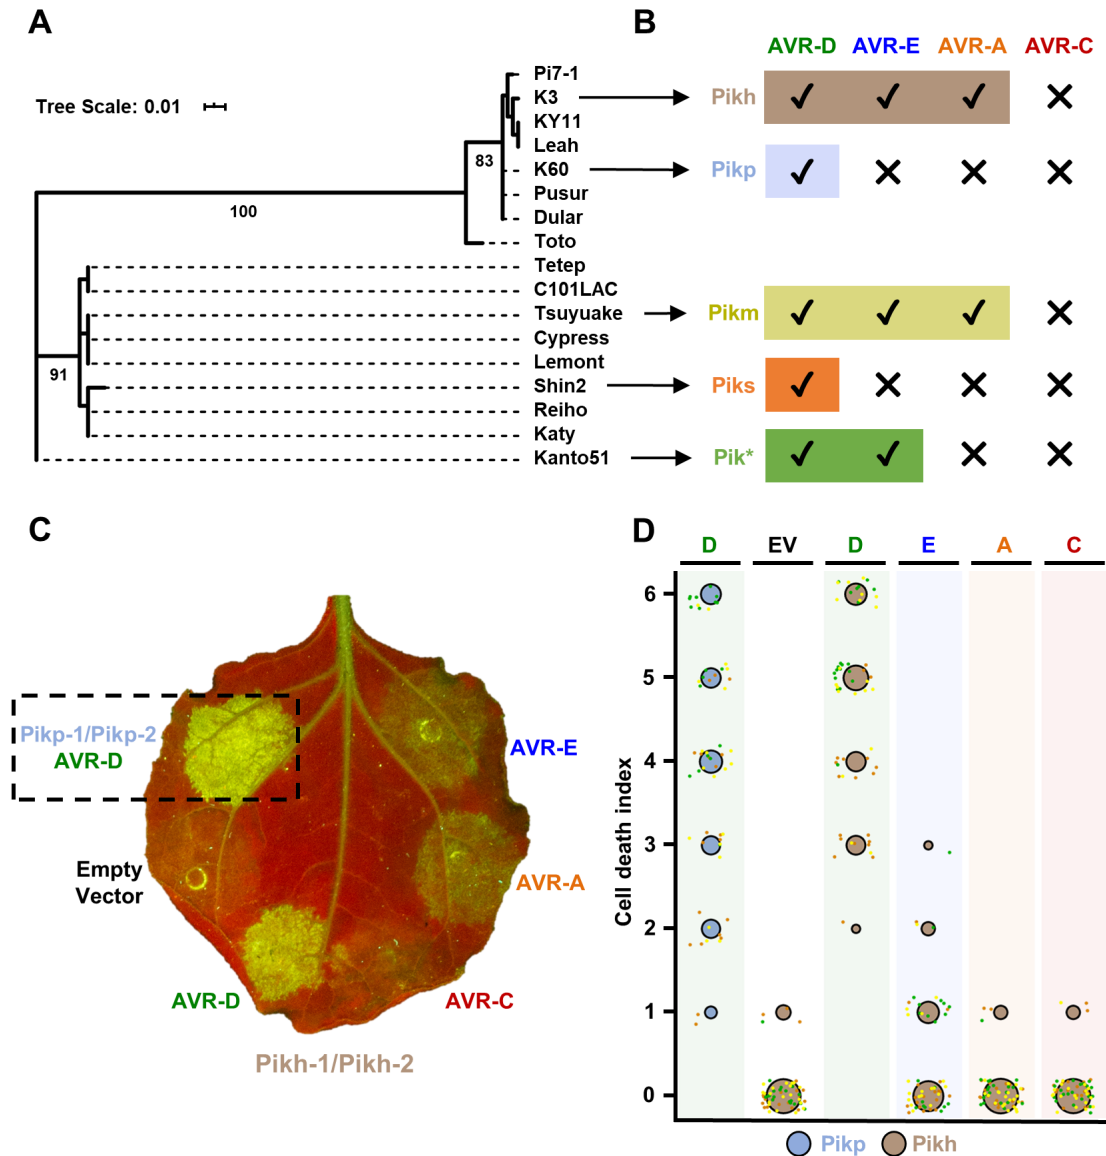

553

554 **Figure 1. Pikh cell death responses to AVR-Pik variants in *N. benthamiana*.** (A) Maximum  
 555 Likelihood Phylogenetic tree of coding sequences of rice Pik-1 HMA domains. The tree was  
 556 prepared using Interactive Tree Of Life (iTOL) v4 [77]. Cultivar names are placed next to their  
 557 corresponding branch. Significant bootstrap values (>75) are indicated. (B) Schematic  
 558 representations of immune response profiles of rice cultivars K3 (Pikh), K60 (Pikp), Tsuyuake  
 559 (Pikm), Shin2 (Piks) and Kanto51 (Pik\*) as reported in [45]. (C) Representative leaf image  
 560 showing Pikh-mediated cell death to AVR-Pik variants as autofluorescence under UV light.  
 561 Pikp-mediated cell death with AVR-PikD is included as a positive control (surrounded by a  
 562 dashed square), and a spot inoculated with empty vector instead of AVR-Pik effector is

563 included a negative control. **(D)** Cell death assay scoring represented as dot plots. Fluorescence  
564 intensity is scored as previously described in [20, 21]. Pikh-mediated cell death is coloured in  
565 brown while the Pikh control is coloured in blue. For each sample, all the data points are  
566 represented as dots with a distinct colour for each of the three biological replicates; these dots  
567 are jittered about the cell death score for visualisation purposes. The size of the centre dot at  
568 each cell death value is directly proportional to the number of replicates in the sample with that  
569 score. The total number of repeats was 60.



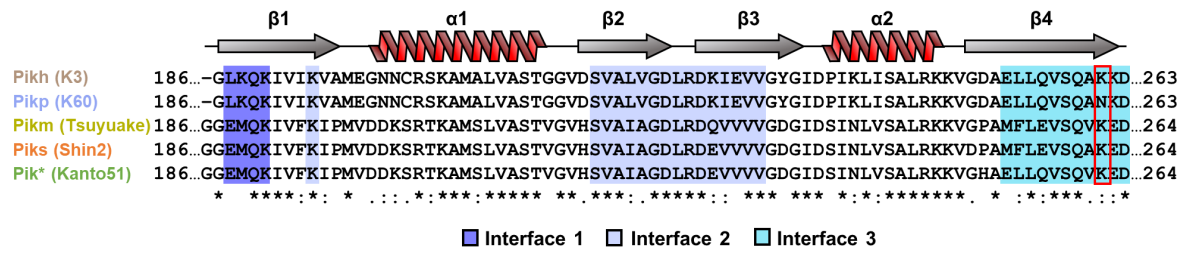

570

571 **Supplemental figure 1. Amino acid sequence alignment of HMA domains of rice cultivars**  
 572 **harbouring different Pik alleles.** Amino acid sequence alignment of Pikh-1, Pikip-1, Pikhm-1,  
 573 Pikhk-1 and Pikh\*-1. Secondary structure features of the HMA fold are shown above, and the  
 574 residues located to the binding interfaces as described in [20] are highlighted. The Pikh-HMA  
 575 polymorphic position (residue 261), located in binding interface three, is indicated in a red  
 576 square.

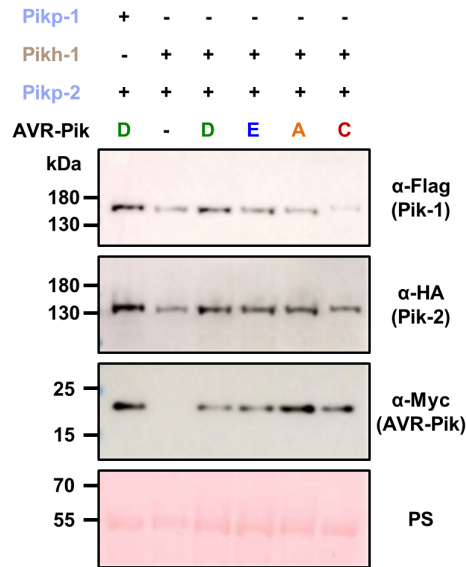

577

578 **Supplemental figure 2. Western blots confirming the accumulation of proteins in *N.***  
579 ***benthamiana* cell death assays.** Plant lysate was probed for the expression of Pikh-1, Pikp-2  
580 (100% identical to Pikh-2) and AVR-Pik effectors using anti-FLAG, anti-HA and anti-Myc  
581 antisera, respectively. Accumulation of the control Pikp-1/Pikp-2/AVR-PikD proteins were  
582 also measured as a comparison. Total protein extracts were visualized by Ponceau Staining  
583 (PS).

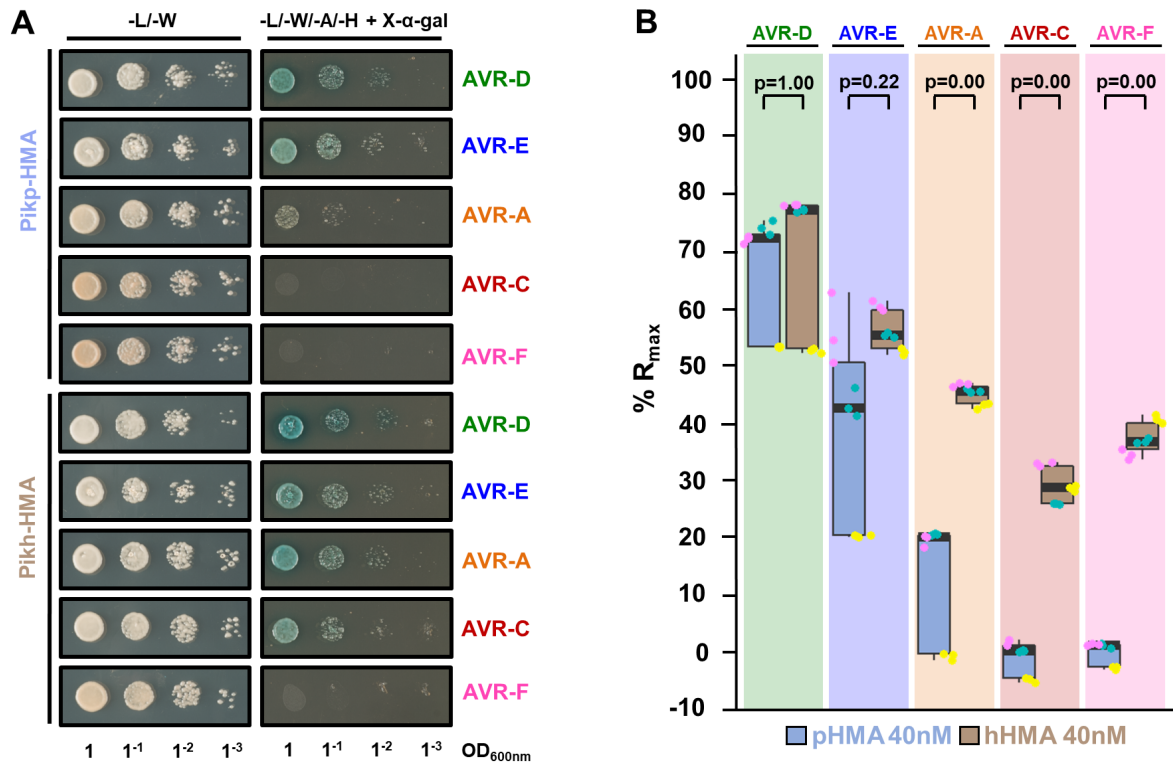

584

585 **Figure 2. Pikh-HMA has increased binding to AVR-Pik effector alleles in vivo and in**  
 586 **vitro. (A)** Yeast two-hybrid assay of Pikp-HMA and Pikh-HMA with AVR-Pik variants. For  
 587 each combination of HMA/AVR-Pik, 5 $\mu$ l of yeast were spotted and incubated for ~60 h in  
 588 double dropout plate for yeast growth control (left) and quadruple dropout media supplemented  
 589 with X- $\alpha$ -gal (right). Growth, and development of blue colouration, in the selection plate are  
 590 both indicative of protein:protein interaction. HMA domains were fused to the GAL4 DNA  
 591 binding domain, and AVR-Pik alleles to the GAL4 activator domain. Each experiment was  
 592 repeated a minimum of three times, with similar results. **(B)** Measurement of Pikp-HMA and  
 593 Pikh-HMA binding to AVR-Pik effector variants by surface plasmon resonance. The binding  
 594 is expressed as %R<sub>max</sub> at an HMA concentration of 40 nM. Pikp-HMA and Pikh-HMA are  
 595 represented by blue and brown boxes, respectively. For each experiment, three biological  
 596 replicates with three internal repeats each were performed, and the data are presented as box  
 597 plots. The centre line represents the median, the box limits are the upper and lower quartiles,  
 598 the whiskers extend to the largest value within Q1 - 1.5 $\times$  the interquartile range (IQR) and the  
 599 smallest value within Q3 + 1.5 $\times$  IQR. All the data points are represented as dots with distinct  
 600 colours for each biological replicate. “p” is the p-value obtained from statistical analysis and  
 601 Tukey’s HSD. For results of experiments with 4 and 100 nM HMA protein concentrations, see  
 602 **Supplemental figure 5.**

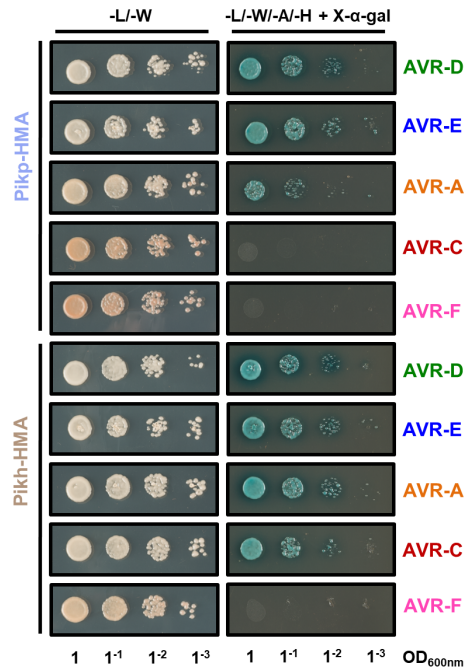

603

604 **Supplemental figure 3. Yeast two-hybrid assay of Pikp-HMA and Pikh-HMA with AVR-**  
605 **Pik variants following an extended incubation.** For each combination of HMA/AVR-Pik,  
606 5µl of yeast were spotted and incubated for ~84 h in double dropout plate for yeast growth  
607 control (left) and quadruple dropout media supplemented with X-α-gal (right). Growth, and  
608 development of blue colouration, in the selection plate are both indicative of protein:protein  
609 interaction. HMA domains were fused to the GAL4 DNA binding domain, and AVR-Pik alleles  
610 to the GAL4 activator domain. Each experiment was repeated a minimum of three times, with  
611 similar results.

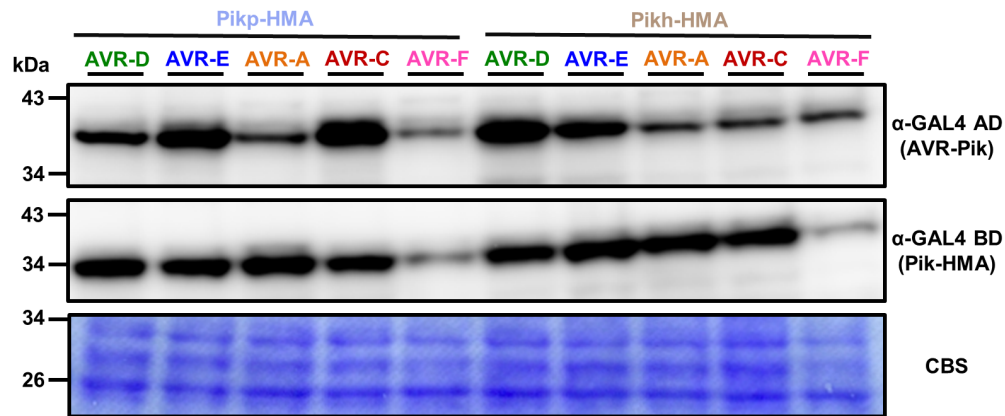

612

613 **Supplemental figure 4. Accumulation of proteins in yeast-two-hybrid assays analysed by**  
614 **Western blot.** Yeast lysate was probed for the expression of AVR-Pik effectors and HMA  
615 domains using anti-GAL4 activation domain (AD) and anti-GAL4 DNA binding domain (BD)  
616 antibodies, respectively. Total protein extracts were coloured with Coomassie Blue Stain  
617 (CBS).

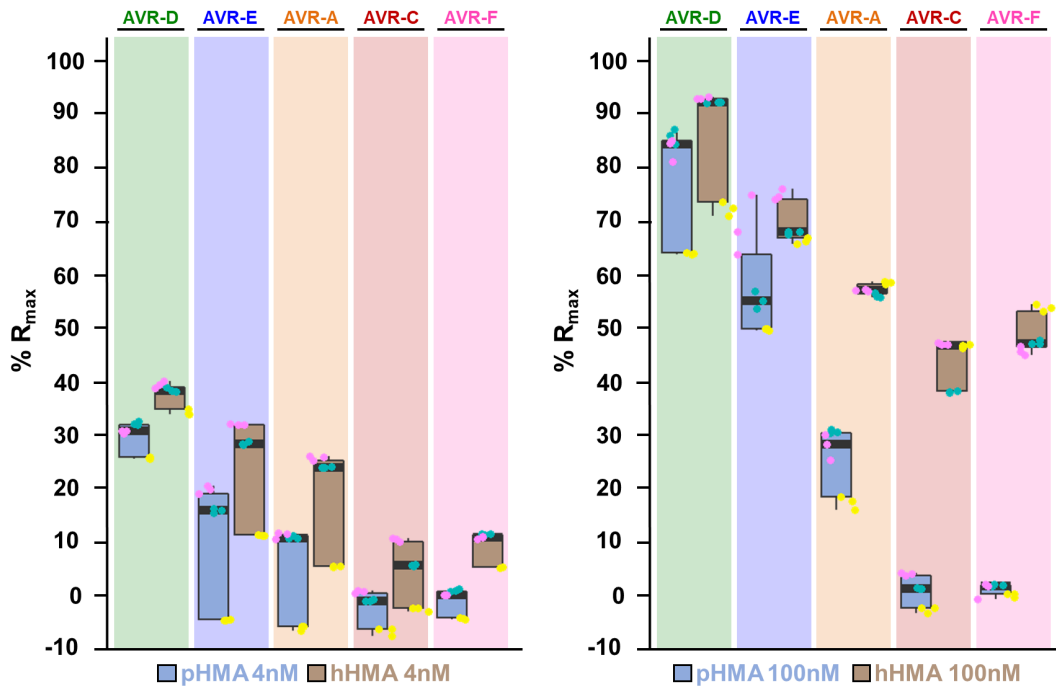

618

619 **Supplemental figure 5. In vitro binding of Pikh-HMA domain to the AVR-Pik effectors**  
620 **measured by SPR is consistently higher compared to Pikip-HMA.** Measurement of Pikip-  
621 HMA and Pikh-HMA binding to AVR-Pik variants measured by surface plasmon resonance.  
622 The binding is expressed as %R<sub>max</sub> at HMA concentration of 4 nM (left) and 100 nM (right).  
623 Pikip-HMA and Pikh-HMA are represented by blue and brown boxes, respectively. For each  
624 experiment, three biological replicates with three internal repeats were performed and the data  
625 are presented as box plots. The centre line represents the median, the box limits are the upper  
626 and lower quartiles, the whiskers extend to the largest value within Q1 - 1.5× the interquartile  
627 range (IQR) and the smallest value within Q3 + 1.5× IQR. All the data points are represented  
628 as dots with distinct colours for each biological replicate.

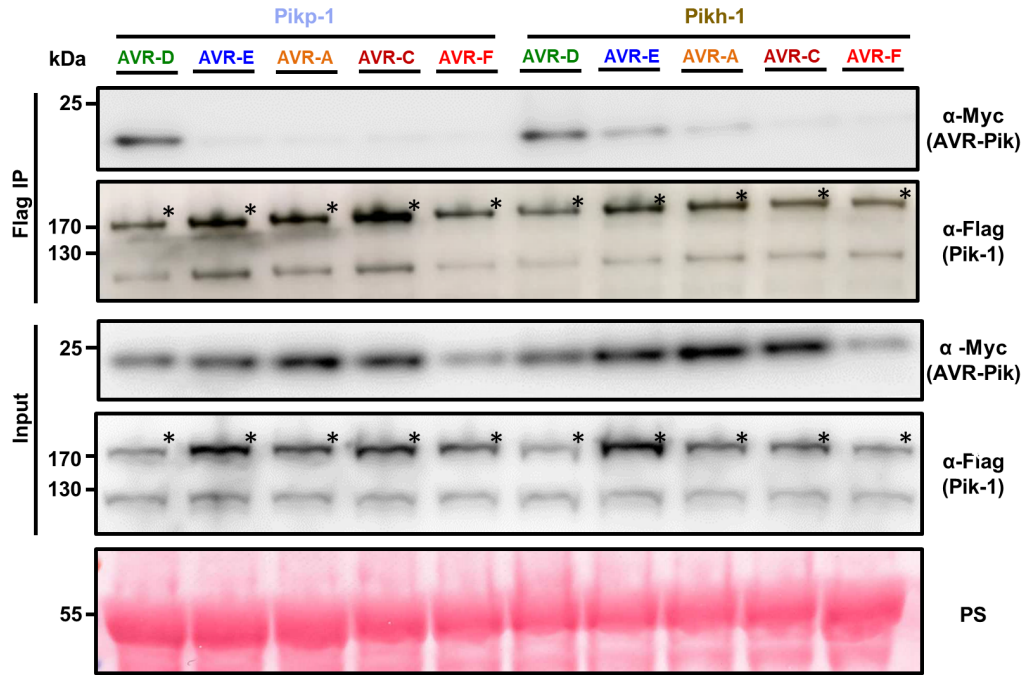

629

630 **Figure 3. The Asn261Lys polymorphism in Pikh-1 extends association to AVR-PikE and**  
631 **AVR-PikA in planta.** Co-immunoprecipitation of full length Pikp-1 and Pikh-1 with AVR-  
632 Pik variants. N-terminally 4xMyc tagged AVR-Pik effectors were transiently co-expressed  
633 with Pikp-1:6xHis3xFLAG (left) or Pikh-1:6xHis3xFLAG (right) in *N. benthamiana*.  
634 Immunoprecipitates (IPs) obtained with M2 anti-FLAG resin and total protein extracts were  
635 probed with appropriate antisera. Each experiment was repeated at least three times, with  
636 similar results. The asterisks mark the Pik-1 band. Total protein extracts were coloured with  
637 Ponceau Staining (PS).

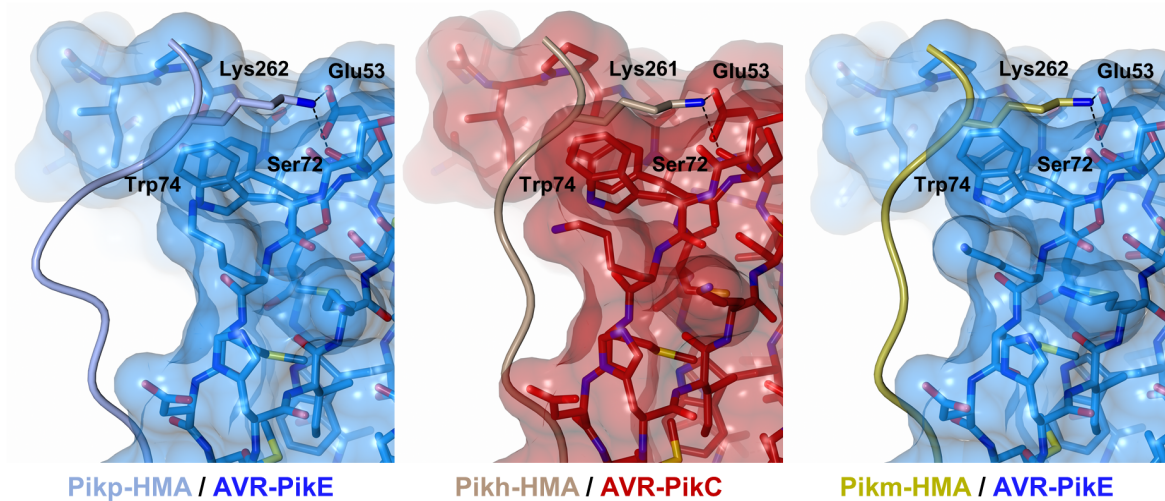

638

639 **Figure 4. The Pikh-HMA domain adopts a favourable conformation at the effector**  
640 **binding interface.** Schematic representation of the conformations adopted by Pikip-HMA  
641 (PDB: 6G11), Pikm-HMA (PDB: 6FUB) and Pikh-HMA at interface 3 in complex with AVR-  
642 Pike or AVR-PikC. In each panel, the effector is represented in cylinders, with the molecular  
643 surface also shown and coloured as labelled. Pikh-HMA residues are coloured as labelled and  
644 shown as the C $\alpha$ -worm. For clarity, only the Lys-261/262 side chain is shown. Hydrogen bonds  
645 between Lys-261/262 and the effector are represented by dashed black lines. (left) Pikip-HMA  
646 bound to AVR-Pike, (middle) Pikh-HMA bound to AVR-PikC, (right) Pikm-HMA bound to  
647 AVR-Pike.



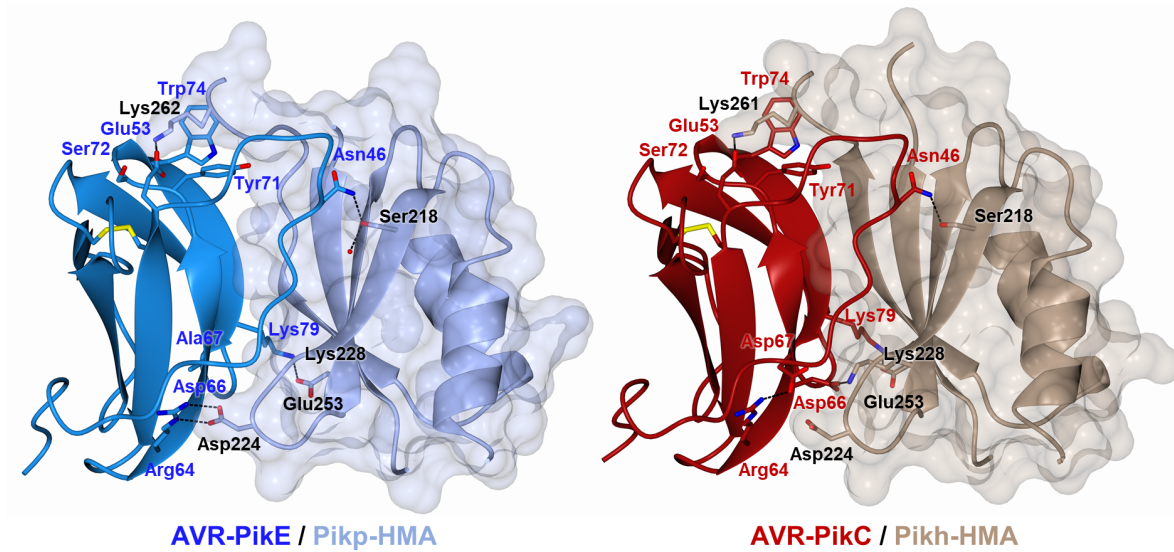

648

649 **Supplemental figure 6. Overall structure of Pikh-HMA in complex with the AVR-PikC**  
650 **effector.** Schematic representation of the structure of Pikh-HMA in complex with AVR-PikC  
651 (right). The structure of Pikip-HMA bound to AVR-PikE (PDB: 6G11) from [20] is included  
652 for comparison (left). HMA domains are presented as cartoon ribbons with selected side chains  
653 as cylinders; the molecular surface of the HMA domain is also shown. Pikh-HMA and Pikip-  
654 HMA are coloured in brown and ice blue, respectively. The effectors are shown in cartoon  
655 ribbon representation, with selected side chains as cylinders. AVR-PikC and AVR-PikE are  
656 coloured in crimson and bright blue, respectively. Hydrogen bonds/salt bridges are shown as  
657 black dashed lines and disulfide bonds as yellow cylinders. For clarity, of the two molecules  
658 of Pik-HMA present in the complex, only the one making extensive contacts with the effector  
659 is shown.

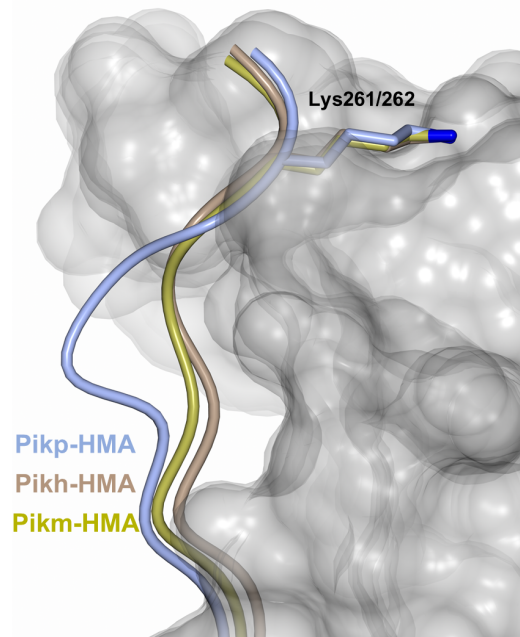

660

661 **Supplemental figure 7. The Pikh-HMA domain adopts a conformation similar to Pikm-**  
662 **HMA.** Superposition showing Pikp-HMA, Pikh-HMA and Pikm-HMA chains (coloured in  
663 blue, brown and yellow, respectively) bound to AVR-Pik. For clarity, only the Lys-261/262  
664 side chain is shown. Two different effector alleles, AVR-PikE and AVR-PikC, are represented  
665 by their molecular surface coloured in grey.

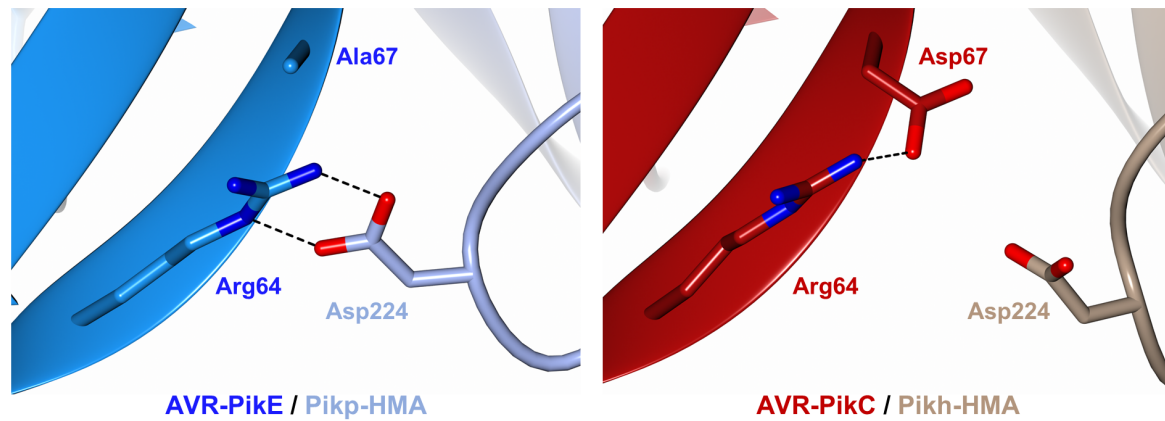

666

667 **Figure 5. The polymorphic Asp67 in AVR-PikC disrupts hydrogen bonding between the**  
668 **effector and the HMA domain.** Close-up views of the position and interactions of Asp224 of  
669 the HMA domain in complex with either AVR-PikE (Pikp-HMA (PDB: 6G11), left) or AVR-  
670 PikC (Pikh-HMA, right). HMA domains are presented as cartoon ribbons with the side chain  
671 of Asp224 displayed as a cylinder; Pikh-HMA and Pikp-HMA are coloured in brown and ice  
672 blue, respectively. The effectors are shown in cartoon ribbon representation, with the side  
673 chains of Arg64 and Asp67/Ala67 as cylinders. AVR-PikC and AVR-PikE are coloured in  
674 crimson and bright blue, respectively. Hydrogen bonds/salt bridges are shown as black dashed  
675 lines. For clarity, the N-terminal residues 32 to 52 of the AVR-Pik effector are hidden from the  
676 foreground in both structures.

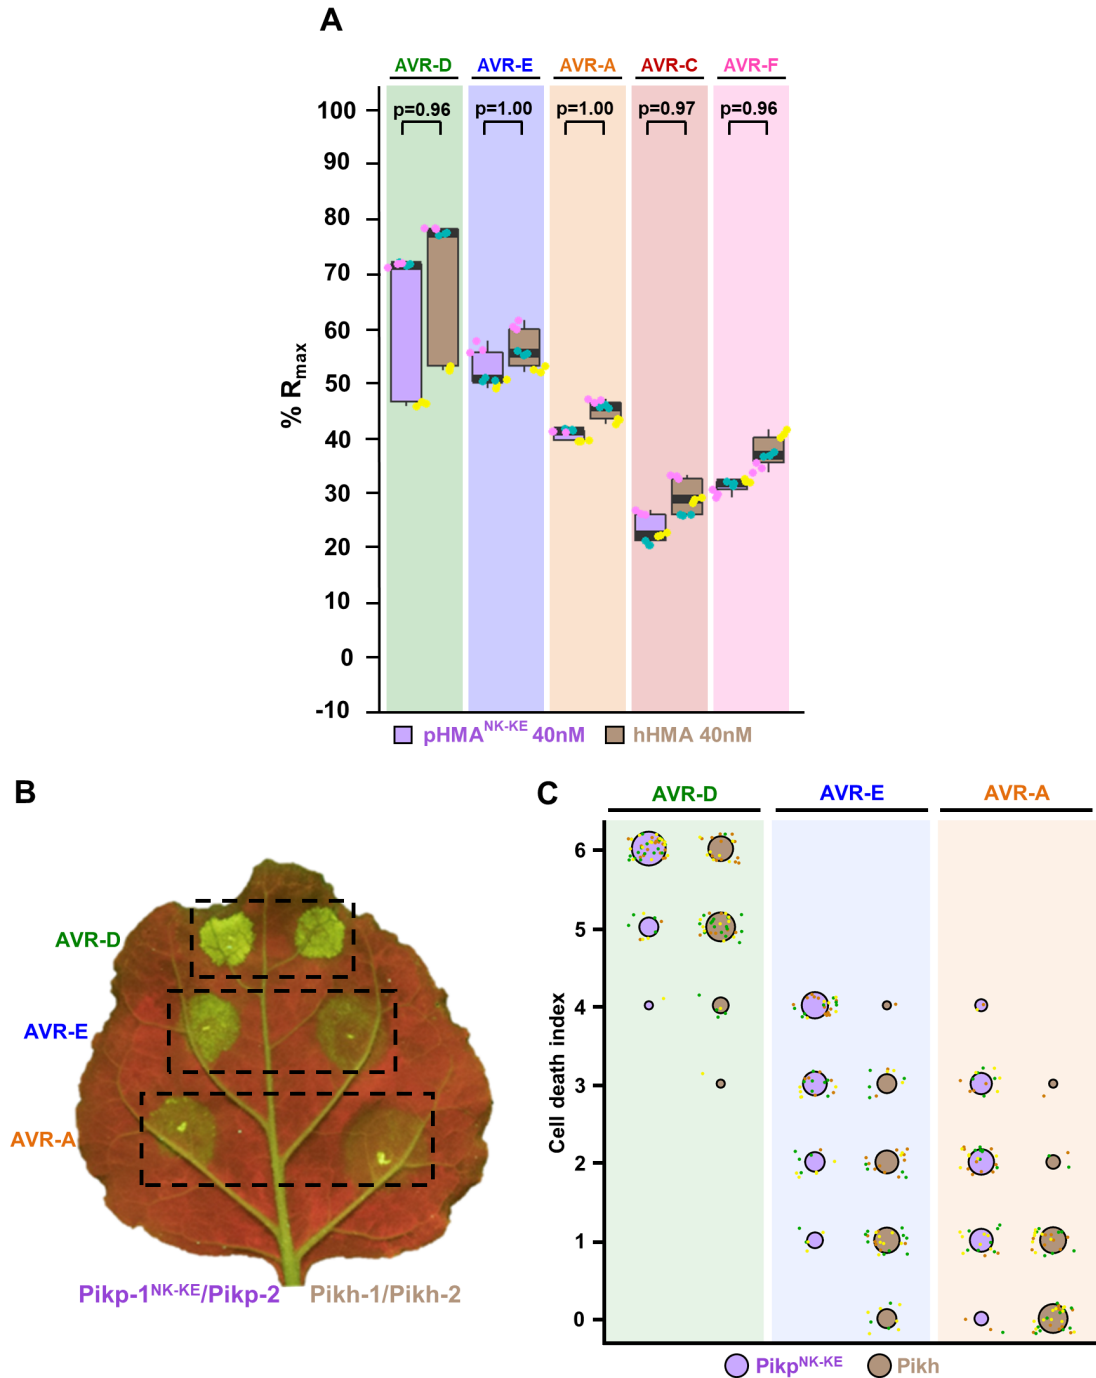

677

678 **Figure 6. Pkh and Pkp<sup>NK-KE</sup> display similar binding affinity for AVR-Pik effectors but**  
 679 **Pkh shows a reduced cell death response in planta. (A)** Pkp-HMA<sup>NK-KE</sup> and Pkh-HMA  
 680 binding to AVR-Pik effector variants determined by surface plasmon resonance. The binding  
 681 is expressed as %R<sub>max</sub> at an HMA concentration of 40 nM. Pkp-HMA<sup>NK-KE</sup> and Pkh-HMA  
 682 are represented by purple and brown boxes, respectively. For each experiment, three biological  
 683 replicates with three internal repeats each were performed and the data are presented as box  
 684 plots. The centre line represents the median, the box limits are the upper and lower quartiles,

685 the whiskers extend to the largest value within  $Q1 - 1.5 \times$  the interquartile range (IQR) and the  
686 smallest value within  $Q3 + 1.5 \times$  IQR. All the data points are represented as dots with distinct  
687 colours for each biological replicate. “p” is the p-value obtained from statistical analysis and  
688 Tukey’s HSD. Data for Pikh-HMA is also presented in **Figure 2b** and were collected side-by-  
689 side at the same time. For results of experiments with 4 and 100 nM HMA protein concentration  
690 see **Supplemental figure 8. (B)** Representative leaf image showing a side-by-side cell death  
691 assay for Pikh<sup>NK-KE</sup> and Pikh with AVR-PikD, AVR-PikE and AVR-PikA. **(C)** Cell death  
692 assay scoring represented as dot plots. Fluorescence intensity is scored as previously described  
693 in [20, 21]. Cell death mediated by Pikh<sup>NK-KE</sup> and Pikh is coloured in purple and brown,  
694 respectively. For each sample, all the data points are represented as dots with a distinct colour  
695 for each of the three biological replicates; these dots are jittered about the cell death score for  
696 visualisation purposes. The size of the centre dot at each cell death value is directly proportional  
697 to the number of replicates in the sample with that score. The total number of repeats was 57.  
698 For statistical analysis of the differences between the cell death mediated by Pikh<sup>NK-KE</sup> and Pikh  
699 see **Supplemental figure 9.**

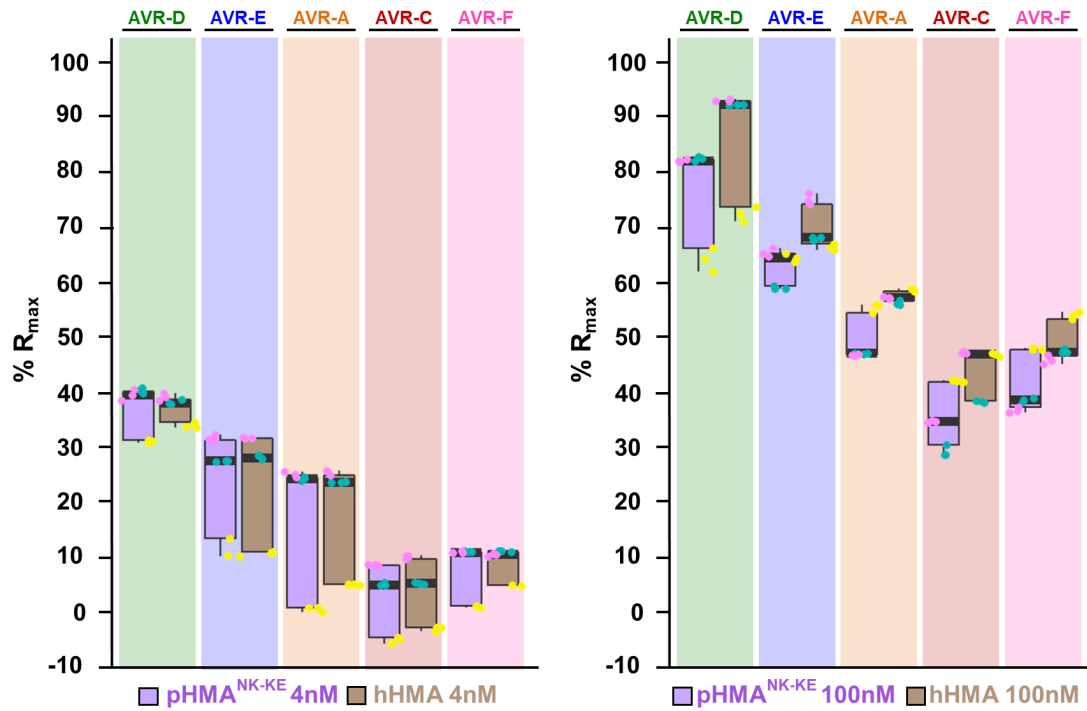

700

701 **Supplemental figure 8. In vitro binding of the Pikh-HMA domain to the AVR-Pik**  
702 **effectors measured by SPR is similar to Pikh-HMA<sup>NK-KE</sup>.** Measurement of Pikh-HMA<sup>NK-KE</sup>  
703 and Pikh-HMA binding to AVR-Pik variants measured by surface plasmon resonance. The  
704 binding is expressed as %R<sub>max</sub> at HMA concentration of 4 nM (left) and 100 nM (right). Pikh-  
705 HMA<sup>NK-KE</sup> and Pikh-HMA are represented by purple and brown boxes, respectively. For each  
706 experiment, three biological replicates with three internal repeats were performed and the data  
707 are presented as box plots. The centre line represents the median, the box limits are the upper  
708 and lower quartiles, the whiskers extend to the largest value within Q1 - 1.5× the interquartile  
709 range (IQR) and the smallest value within Q3 + 1.5× IQR. All the data points are represented  
710 as dots with distinct colours for each biological replicate. Data for Pikh-HMA is also presented  
711 in **Supplemental figure 5** and were collected side-by-side at the same time.

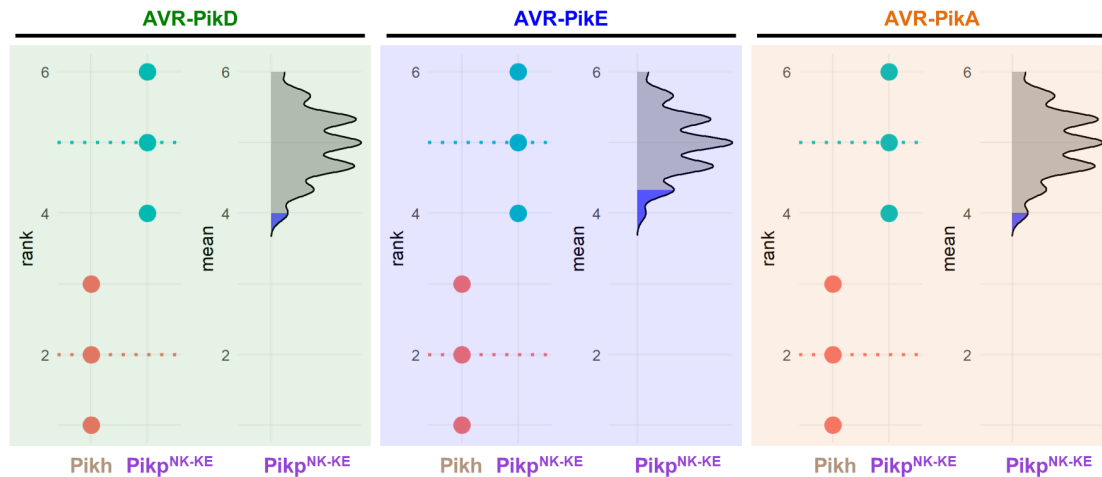

712

713 **Supplemental figure 9. Estimation graphics for comparison of cell death mediated by**  
714 **Pikh and Pikp<sup>NK-KE</sup>.** Statistical analysis by estimation methods of the cell-death assay for Pikh  
715 and Pikp<sup>NK-KE</sup>. For each effector, the panel on the left represents the ranked data (dots) for each  
716 NLR, and their corresponding mean (dotted line). The size of the dots is proportional to the  
717 number of observations with that specific value. The panel on the right shows the distribution  
718 of 1000 bootstrap sample rank means for Pikp<sup>NK-KE</sup>. The blue areas represent the 0.025 and  
719 0.975 percentiles of the distribution. The responses of Pikh and Pikp<sup>NK-KE</sup> are considered  
720 significantly different if the Pikh rank mean (dotted line, left panel) falls beyond the blue  
721 regions of the Pikp<sup>NK-KE</sup> mean distribution.

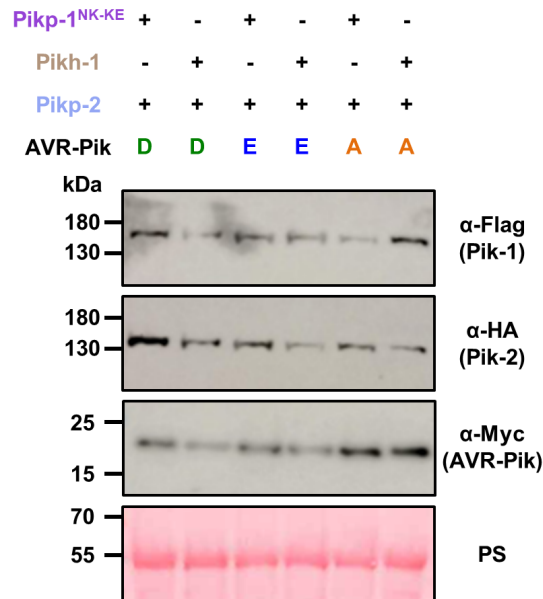

722

723 **Supplemental figure 10. Western blots confirming the accumulation of proteins in *N.***  
724 ***benthamiana*.** Plant lysate was probed for the expression of Pikp<sup>NK-KE</sup>-1/Pikh-1, Pikp-2 and  
725 AVR-Pik effectors using anti-FLAG, anti-HA and anti-Myc antiserum, respectively. Total  
726 protein extracts were visualised by Ponceau Staining (PS).



---

| <b>Data collection statistics</b>                  |                                                       |
|----------------------------------------------------|-------------------------------------------------------|
| Wavelength (Å)                                     | 0.98                                                  |
| Space group                                        | <i>P</i> 2 <sub>1</sub> 2 <sub>1</sub> 2 <sub>1</sub> |
| Cell dimensions <i>a</i> , <i>b</i> , <i>c</i> (Å) | 65.35, 83.12, 107.84                                  |
| Resolution (Å)*                                    | 107.84-2.30 (2.38-2.30)                               |
| R <sub>merge</sub> (%)                             | 6.1 (92.7)                                            |
| <i>I</i> / <i>σ</i> <i>I</i>                       | 22.7 (2.5)                                            |
| Completeness (%)                                   | 96.4 (100.0)                                          |
| Unique reflections                                 | 25847 (2570)                                          |
| Redundancy                                         | 13.1 (12.0)                                           |
| CC(1/2) (%)                                        | 100.0 (86.4)                                          |

---

| <b>Refinement and model statistics</b>   |                                    |
|------------------------------------------|------------------------------------|
| Resolution (Å)                           | 65.92-2.30 (2.36-2.30)             |
| R <sub>work</sub> /R <sub>free</sub> (%) | 21.0/25.5 (26.6/31.1)              |
| No. atoms                                |                                    |
| Protein                                  | 3464                               |
| Water                                    | 116                                |
| B-factors                                |                                    |
| Protein                                  | 61.5                               |
| Water                                    | 55.2                               |
| R.m.s deviations                         |                                    |
| Bond lengths (Å)                         | 0.008                              |
| Bond angles (°)                          | 1.486                              |
| Ramachandran plot (%)**                  |                                    |
| Favoured                                 | 97.93                              |
| Allowed                                  | 2.07                               |
| Outliers                                 | 0                                  |
| MolProbity Score                         | 1.52 (99 <sup>th</sup> percentile) |

---

\* The highest resolution shell is shown in parenthesis.

\*\* As calculated by MolProbity

727

728 **Supplemental table 1.** Data collection and refinement statistics for the crystal structure of the  
729 Pikh-HMA AVR-PikC complex.

| <b>Complex (compared to Pikh/AVR-PikC)</b> | <b>AVR-Pik</b>                    | <b>HMA</b>                        | <b>Overall</b>                    |
|--------------------------------------------|-----------------------------------|-----------------------------------|-----------------------------------|
|                                            | r.m.s.d. - Å<br>(no. of residues) | r.m.s.d. - Å<br>(no. of residues) | r.m.s.d. - Å<br>(no. of residues) |
| Pikp/AVR-PikE                              | 0.31 (82 aa)                      | 0.61 (72 aa)                      | 0.70 (154 aa)                     |
| Pikm/AVR-PikE                              | 0.46 (81 aa)                      | 0.92 (74 aa)                      | 0.92 (165 aa)                     |

730

731 **Supplemental table 2.** Summary of superposition analysis (as calculated with secondary  
732 structure matching (SSM) in CCP4MG version 2.10.10). For Pikh-HMA/AVR-PikC, chains E  
733 and F were used.

## 734 References

- 735 1. Savary S, Willocquet L, Pethybridge SJ, Esker P, McRoberts N, Nelson A. The global burden of  
736 pathogens and pests on major food crops. *Nat Ecol Evol.* 2019;3(3):430-9. Epub 2019/02/06. doi:  
737 10.1038/s41559-018-0793-y. PubMed PMID: 30718852.
- 738 2. Win J, Chaparro-Garcia A, Belhaj K, Saunders DG, Yoshida K, Dong S, et al. Effector biology of  
739 plant-associated organisms: concepts and perspectives. *Cold Spring Harb Symp Quant Biol.*  
740 2012;77:235-47. Epub 2012/12/12. doi: 10.1101/sqb.2012.77.015933. PubMed PMID: 23223409.
- 741 3. Jones JDG, Vance RE, Dangl JL. Intracellular innate immune surveillance devices in plants and  
742 animals. *Science.* 2016;354(6316):aaf6395. doi: 10.1126/science.aaf6395.
- 743 4. Bentham AR, De la Concepcion JC, Mukhi N, Zdrzalek R, Draeger M, Gorenkin D, et al. A  
744 molecular roadmap to the plant immune system. *J Biol Chem.* 2020. Epub 2020/08/21. doi:  
745 10.1074/jbc.REV120.010852. PubMed PMID: 32816993.
- 746 5. Jones JDG, Dangl JL. The plant immune system. *Nature.* 2006;444(7117):323-9. Epub  
747 2006/11/17. doi: 10.1038/nature05286. PubMed PMID: 17108957.
- 748 6. Meyers BC, Kozik A, Griego A, Kuang H, Michelmore RW. Genome-wide analysis of NBS-LRR-  
749 encoding genes in Arabidopsis. *The Plant cell.* 2003;15(4):809-34. Epub 2003/04/03. PubMed PMID:  
750 12671079; PubMed Central PMCID: PMCPMC152331.
- 751 7. Yue JX, Meyers BC, Chen JQ, Tian D, Yang S. Tracing the origin and evolutionary history of plant  
752 nucleotide-binding site-leucine-rich repeat (NBS-LRR) genes. *New Phytol.* 2012;193(4):1049-63. Epub  
753 2012/01/04. doi: 10.1111/j.1469-8137.2011.04006.x. PubMed PMID: 22212278.
- 754 8. Saur IM, Bauer S, Kracher B, Lu X, Franzesakis L, Muller MC, et al. Multiple pairs of allelic MLA  
755 immune receptor-powdery mildew AVRA effectors argue for a direct recognition mechanism. *Elife.*  
756 2019;8. Epub 2019/02/20. doi: 10.7554/eLife.44471. PubMed PMID: 30777147; PubMed Central  
757 PMCID: PMCPMC6414202.
- 758 9. Bourras S, Kunz L, Xue M, Praz CR, Müller MC, Kälin C, et al. The AvrPm3-Pm3 effector-NLR  
759 interactions control both race-specific resistance and host-specificity of cereal mildews on wheat.  
760 *Nature Communications.* 2019;10(1):2292. doi: 10.1038/s41467-019-10274-1.
- 761 10. Lu X, Kracher B, Saur IM, Bauer S, Ellwood SR, Wise R, et al. Allelic barley MLA immune  
762 receptors recognize sequence-unrelated avirulence effectors of the powdery mildew pathogen. *Proc*  
763 *Natl Acad Sci U S A.* 2016;113(42):E6486-e95. Epub 2016/10/30. doi: 10.1073/pnas.1612947113.  
764 PubMed PMID: 27702901; PubMed Central PMCID: PMCPMC5081590.
- 765 11. Allen RL, Bittner-Eddy PD, Grenville-Briggs LJ, Meitz JC, Rehmany AP, Rose LE, et al. Host-  
766 parasite coevolutionary conflict between Arabidopsis and downy mildew. *Science.*  
767 2004;306(5703):1957-60. Epub 2004/12/14. doi: 10.1126/science.1104022. PubMed PMID:  
768 15591208.
- 769 12. Dodds PN, Lawrence GJ, Catanzariti AM, Teh T, Wang CI, Ayliffe MA, et al. Direct protein  
770 interaction underlies gene-for-gene specificity and coevolution of the flax resistance genes and flax  
771 rust avirulence genes. *Proc Natl Acad Sci U S A.* 2006;103(23):8888-93. Epub 2006/05/30. doi:  
772 10.1073/pnas.0602577103. PubMed PMID: 16731621; PubMed Central PMCID: PMCPMC1482673.
- 773 13. Bergelson J, Kreitman M, Stahl EA, Tian D. Evolutionary Dynamics of Plant R-Genes. *Science.*  
774 2001;292(5525):2281-5. doi: 10.1126/science.1061337.
- 775 14. Cesari S. Multiple strategies for pathogen perception by plant immune receptors. *New Phytol.*  
776 2018;219(1):17-24. Epub 2017/11/14. doi: 10.1111/nph.14877. PubMed PMID: 29131341.
- 777 15. Kourelis J, van der Hoorn RAL. Defended to the Nines: 25 Years of Resistance Gene Cloning  
778 Identifies Nine Mechanisms for R Protein Function. *The Plant cell.* 2018;30(2):285-99. Epub  
779 2018/02/01. doi: 10.1105/tpc.17.00579. PubMed PMID: 29382771; PubMed Central PMCID:  
780 PMCPMC5868693.
- 781 16. Cesari S, Bernoux M, Moncuquet P, Kroj T, Dodds PN. A novel conserved mechanism for plant  
782 NLR protein pairs: the "integrated decoy" hypothesis. *Front Plant Sci.* 2014;5:606. Epub 2014/12/17.  
783 doi: 10.3389/fpls.2014.00606. PubMed PMID: 25506347; PubMed Central PMCID: PMCPMC4246468.

- 784 17. Kroj T, Chanclud E, Michel-Romiti C, Grand X, Morel JB. Integration of decoy domains derived  
785 from protein targets of pathogen effectors into plant immune receptors is widespread. *New Phytol.*  
786 2016;210(2):618-26. Epub 2016/02/06. doi: 10.1111/nph.13869. PubMed PMID: 26848538; PubMed  
787 Central PMCID: PMC5067614.
- 788 18. Sarris PF, Cevik V, Dagdas G, Jones JD, Krasileva KV. Comparative analysis of plant immune  
789 receptor architectures uncovers host proteins likely targeted by pathogens. *BMC Biol.* 2016;14:8. Epub  
790 2016/02/20. doi: 10.1186/s12915-016-0228-7. PubMed PMID: 26891798; PubMed Central PMCID:  
791 PMC4759884.
- 792 19. Bailey PC, Schudoma C, Jackson W, Baggs E, Dagdas G, Haerty W, et al. Dominant integration  
793 locus drives continuous diversification of plant immune receptors with exogenous domain fusions.  
794 *Genome Biol.* 2018;19(1):23. Epub 2018/02/21. doi: 10.1186/s13059-018-1392-6. PubMed PMID:  
795 29458393; PubMed Central PMCID: PMC5819176.
- 796 20. De la Concepcion JC, Franceschetti M, Maqbool A, Saitoh H, Terauchi R, Kamoun S, et al.  
797 Polymorphic residues in rice NLRs expand binding and response to effectors of the blast pathogen.  
798 *Nat Plants.* 2018;4(8):576-85. Epub 2018/07/11. doi: 10.1038/s41477-018-0194-x. PubMed PMID:  
799 29988155.
- 800 21. Maqbool A, Saitoh H, Franceschetti M, Stevenson CE, Uemura A, Kanzaki H, et al. Structural  
801 basis of pathogen recognition by an integrated HMA domain in a plant NLR immune receptor. *Elife.*  
802 2015;4. Epub 2015/08/26. doi: 10.7554/eLife.08709. PubMed PMID: 26304198; PubMed Central  
803 PMCID: PMC4547098.
- 804 22. Zhang ZM, Ma KW, Gao L, Hu Z, Schwizer S, Ma W, et al. Mechanism of host substrate  
805 acetylation by a YopJ family effector. *Nat Plants.* 2017;3:17115. Epub 2017/07/25. doi:  
806 10.1038/nplants.2017.115. PubMed PMID: 28737762; PubMed Central PMCID: PMC5546152.
- 807 23. Guo L, Cesari S, de Guillen K, Chalvon V, Mammri L, Ma M, et al. Specific recognition of two  
808 MAX effectors by integrated HMA domains in plant immune receptors involves distinct binding  
809 surfaces. *Proc Natl Acad Sci U S A.* 2018;115(45):11637-42. Epub 2018/10/26. doi:  
810 10.1073/pnas.1810705115. PubMed PMID: 30355769; PubMed Central PMCID: PMC6233088.
- 811 24. De la Concepcion JC, Franceschetti M, MacLean D, Terauchi R, Kamoun S, Banfield MJ. Protein  
812 engineering expands the effector recognition profile of a rice NLR immune receptor. *eLife.*  
813 2019;8:e47713. doi: 10.7554/eLife.47713.
- 814 25. Talbot NJ. On the trail of a cereal killer: Exploring the biology of *Magnaporthe grisea*. *Annu*  
815 *Rev Microbiol.* 2003;57:177-202. Epub 2003/10/07. doi: 10.1146/annurev.micro.57.030502.090957.  
816 PubMed PMID: 14527276.
- 817 26. Wilson RA, Talbot NJ. Under pressure: investigating the biology of plant infection by  
818 *Magnaporthe oryzae*. *Nature Reviews Microbiology.* 2009;7(3):185-95. Epub 2009/02/17. doi:  
819 10.1038/nrmicro2032. PubMed PMID: 19219052.
- 820 27. Islam MT, Croll D, Gladieux P, Soanes DM, Persoons A, Bhattacharjee P, et al. Emergence of  
821 wheat blast in Bangladesh was caused by a South American lineage of *Magnaporthe oryzae*. *BMC*  
822 *Biology.* 2016;14(1):84. doi: 10.1186/s12915-016-0309-7.
- 823 28. Cruz CD, Valent B. Wheat blast disease: danger on the move. *Tropical Plant Pathology.*  
824 2017;42(3):210-22. doi: 10.1007/s40858-017-0159-z.
- 825 29. Dean RA, Talbot NJ, Ebbole DJ, Farman ML, Mitchell TK, Orbach MJ, et al. The genome  
826 sequence of the rice blast fungus *Magnaporthe grisea*. *Nature.* 2005;434(7036):980-6. doi:  
827 10.1038/nature03449.
- 828 30. Yang S, Li J, Zhang X, Zhang Q, Huang J, Chen J-Q, et al. Rapidly evolving *R* genes in diverse  
829 grass species confer resistance to rice blast disease. *Proceedings of the National Academy of Sciences.*  
830 2013;110(46):18572-7. doi: 10.1073/pnas.1318211110.
- 831 31. Wang L, Zhao L, Zhang X, Zhang Q, Jia Y, Wang G, et al. Large-scale identification and functional  
832 analysis of *NLR* genes in blast resistance in the Tetep rice genome sequence. *Proceedings of the*  
833 *National Academy of Sciences.* 2019:201910229. doi: 10.1073/pnas.1910229116.

- 834 32. Stein JC, Yu Y, Copetti D, Zwickl DJ, Zhang L, Zhang C, et al. Genomes of 13 domesticated and  
835 wild rice relatives highlight genetic conservation, turnover and innovation across the genus *Oryza*.  
836 *Nature Genetics*. 2018;50(2):285-96. doi: 10.1038/s41588-018-0040-0.
- 837 33. Bialas A, Zess EK, De la Concepcion JC, Franceschetti M, Pennington HG, Yoshida K, et al.  
838 Lessons in Effector and NLR Biology of Plant-Microbe Systems. *Mol Plant Microbe Interact*.  
839 2018;31(1):34-45. Epub 2017/11/17. doi: 10.1094/MPMI-08-17-0196-FI. PubMed PMID: 29144205.
- 840 34. Latorre SM, Reyes-Avila CS, Malmgren A, Win J, Kamoun S, Burbano HA. Differential loss of  
841 effector genes in three recently expanded pandemic clonal lineages of the rice blast fungus. *BMC Biol*.  
842 2020;18(1):88. Epub 2020/07/18. doi: 10.1186/s12915-020-00818-z. PubMed PMID: 32677941;  
843 PubMed Central PMCID: PMCPCMC7364606.
- 844 35. Yoshida K, Saunders DG, Mitsuoka C, Natsume S, Kosugi S, Saitoh H, et al. Host specialization  
845 of the blast fungus *Magnaporthe oryzae* is associated with dynamic gain and loss of genes linked to  
846 transposable elements. *BMC Genomics*. 2016;17:370. Epub 2016/05/20. doi: 10.1186/s12864-016-  
847 2690-6. PubMed PMID: 27194050; PubMed Central PMCID: PMCPCMC4870811.
- 848 36. Huang J, Si W, Deng Q, Li P, Yang S. Rapid evolution of avirulence genes in rice blast fungus  
849 *Magnaporthe oryzae*. *BMC Genetics*. 2014;15(1):45. doi: 10.1186/1471-2156-15-45.
- 850 37. Inoue Y, Vy TTP, Yoshida K, Asano H, Mitsuoka C, Asuke S, et al. Evolution of the wheat blast  
851 fungus through functional losses in a host specificity determinant. *Science*. 2017;357(6346):80-3. Epub  
852 2017/07/08. doi: 10.1126/science.aam9654. PubMed PMID: 28684523.
- 853 38. Dean R, Van Kan JA, Pretorius ZA, Hammond-Kosack KE, Di Pietro A, Spanu PD, et al. The Top  
854 10 fungal pathogens in molecular plant pathology. *Molecular plant pathology*. 2012;13(4):414-30.  
855 Epub 2012/04/05. doi: 10.1111/j.1364-3703.2011.00783.x. PubMed PMID: 22471698.
- 856 39. Yoshida K, Saitoh H, Fujisawa S, Kanzaki H, Matsumura H, Yoshida K, et al. Association genetics  
857 reveals three novel avirulence genes from the rice blast fungal pathogen *Magnaporthe oryzae*. *The*  
858 *Plant cell*. 2009;21(5):1573-91. Epub 2009/05/21. doi: 10.1105/tpc.109.066324. PubMed PMID:  
859 19454732; PubMed Central PMCID: PMCPCMC2700537.
- 860 40. de Guillen K, Ortiz-Vallejo D, Gracy J, Fournier E, Kroj T, Padilla A. Structure Analysis Uncovers  
861 a Highly Diverse but Structurally Conserved Effector Family in Phytopathogenic Fungi. *PLoS Pathog*.  
862 2015;11(10):e1005228. Epub 2015/10/28. doi: 10.1371/journal.ppat.1005228. PubMed PMID:  
863 26506000; PubMed Central PMCID: PMCPCMC4624222.
- 864 41. Ashikawa I, Hayashi N, Yamane H, Kanamori H, Wu J, Matsumoto T, et al. Two adjacent  
865 nucleotide-binding site-leucine-rich repeat class genes are required to confer Pikm-specific rice blast  
866 resistance. *Genetics*. 2008;180(4):2267-76. Epub 2008/10/23. doi: 10.1534/genetics.108.095034.  
867 PubMed PMID: 18940787; PubMed Central PMCID: PMCPCMC2600957.
- 868 42. Tosa Y, Osue J, Eto Y, Oh H-S, Nakayashiki H, Mayama S, et al. Evolution of an Avirulence Gene,  
869 AVR1-CO39, Concomitant with the Evolution and Differentiation of *Magnaporthe oryzae*. *Molecular*  
870 *Plant-Microbe Interactions*<sup>®</sup>. 2005;18(11):1148-60. doi: 10.1094/mpmi-18-1148. PubMed PMID:  
871 16353550.
- 872 43. Li J, Wang Q, Li C, Bi Y, Fu X, Wang R. Novel haplotypes and networks of AVR-Pik alleles in  
873 *Magnaporthe oryzae*. *BMC Plant Biology*. 2019;19(1):204. doi: 10.1186/s12870-019-1817-8.
- 874 44. Longya A, Chaipanya C, Franceschetti M, Maidment JHR, Banfield MJ, Jantasuriyarat C. Gene  
875 Duplication and Mutation in the Emergence of a Novel Aggressive Allele of the AVR-Pik Effector in the  
876 Rice Blast Fungus. *Mol Plant Microbe Interact*. 2019;32(6):740-9. Epub 2019/01/03. doi:  
877 10.1094/MPMI-09-18-0245-R. PubMed PMID: 30601714.
- 878 45. Kanzaki H, Yoshida K, Saitoh H, Fujisaki K, Hirabuchi A, Alaux L, et al. Arms race co-evolution  
879 of *Magnaporthe oryzae* AVR-Pik and rice Pik genes driven by their physical interactions. *Plant J*.  
880 2012;72(6):894-907. Epub 2012/07/19. doi: 10.1111/j.1365-313X.2012.05110.x. PubMed PMID:  
881 22805093.
- 882 46. Kiyosawa S. Identification of Blast-Resistance Genes in Some Rice Varieties. *Japanese Journal*  
883 *of Breeding*. 1978;28(4):287-96. doi: 10.1270/jsbbs1951.28.287.

- 884 47. Kiyosawa S. Inheritance of blast-resistance in west pakistani rice variety, pusur. Japanese  
885 Journal of Breeding. 1969;19(3):121-8. doi: 10.1270/jsbbs1951.19.121.
- 886 48. Kiyosawa S. Inheritance of resistance of rice varieties to a philippine fungus strain of  
887 *pyricularia oryzae*. Japanese Journal of Breeding. 1969;19(2):61-73. doi: 10.1270/jsbbs1951.19.61.
- 888 49. Kiyosawa S, Murty VVS. The inheritance of blast-resistance in indian rice variety, hr-22.  
889 Japanese Journal of Breeding. 1969;19(4):269-76. doi: 10.1270/jsbbs1951.19.269.
- 890 50. Costanzo S, Jia Y. Sequence variation at the rice blast resistance gene Pi-km locus: Implications  
891 for the development of allele specific markers. Plant Science. 2010;178(6):523-30. doi:  
892 <https://doi.org/10.1016/j.plantsci.2010.02.014>.
- 893 51. Franceschetti M, Banfield MJ, Stevenson CEM, De la Concepcion JC. In vitro Assessment of  
894 Pathogen Effector Binding to Host Proteins by Surface Plasmon Resonance. Bio-protocol.  
895 2020;10(13):e3676. doi: 10.21769/BioProtoc.3676.
- 896 52. Dong S, Raffaele S, Kamoun S. The two-speed genomes of filamentous pathogens: waltz with  
897 plants. Current Opinion in Genetics & Development. 2015;35:57-65. doi:  
898 <https://doi.org/10.1016/j.gde.2015.09.001>.
- 899 53. Meyers BC, Kaushik S, Nandety RS. Evolving disease resistance genes. Current Opinion in Plant  
900 Biology. 2005;8(2):129-34. doi: <https://doi.org/10.1016/j.pbi.2005.01.002>.
- 901 54. Na R, Gijzen M. Escaping Host Immunity: New Tricks for Plant Pathogens. PLoS pathogens.  
902 2016;12(7):e1005631-e. doi: 10.1371/journal.ppat.1005631. PubMed PMID: 27389195.
- 903 55. Bebbler DP, Gurr SJ. Crop-destroying fungal and oomycete pathogens challenge food security.  
904 Fungal genetics and biology : FG & B. 2015;74:62-4. Epub 2014/12/03. doi: 10.1016/j.fgb.2014.10.012.  
905 PubMed PMID: 25459533.
- 906 56. Maekawa T, Kracher B, Saur IML, Yoshikawa-Maekawa M, Kellner R, Pankin A, et al. Subfamily-  
907 Specific Specialization of RGH1/MLA Immune Receptors in Wild Barley. Mol Plant Microbe Interact.  
908 2019;32(1):107-19. Epub 2018/10/09. doi: 10.1094/mpmi-07-18-0186-fi. PubMed PMID: 30295580.
- 909 57. Arora S, Steuernagel B, Gaurav K, Chandramohan S, Long Y, Matny O, et al. Resistance gene  
910 cloning from a wild crop relative by sequence capture and association genetics. Nature Biotechnology.  
911 2019;37(2):139-43. doi: 10.1038/s41587-018-0007-9.
- 912 58. Lindner S, Keller B, Singh SP, Hasenkamp Z, Jung E, Müller MC, et al. Single residues in the LRR  
913 domain of the wheat PM3A immune receptor can control the strength and the spectrum of the  
914 immune response. The Plant Journal. 2020;n/a(n/a). doi: 10.1111/tpj.14917.
- 915 59. Wang J, Hu M, Wang J, Qi J, Han Z, Wang G, et al. Reconstitution and structure of a plant NLR  
916 resistosome conferring immunity. Science. 2019;364(6435):eaav5870. doi: 10.1126/science.aav5870.
- 917 60. Adachi H, Contreras M, Harant A, Wu C-h, Derevnina L, Sakai T, et al. An N-terminal motif in  
918 NLR immune receptors is functionally conserved across distantly related plant species. bioRxiv.  
919 2019:693291. doi: 10.1101/693291.
- 920 61. Ma Y, Guo H, Hu L, Martinez PP, Moschou PN, Cevik V, et al. Distinct modes of derepression  
921 of an Arabidopsis immune receptor complex by two different bacterial effectors. Proceedings of the  
922 National Academy of Sciences. 2018;115(41):10218. doi: 10.1073/pnas.1811858115.
- 923 62. Berrow NS, Alderton D, Sainsbury S, Nettleship J, Assenberg R, Rahman N, et al. A versatile  
924 ligation-independent cloning method suitable for high-throughput expression screening applications.  
925 Nucleic Acids Res. 2007;35(6):e45. doi: 10.1093/nar/gkm047. PubMed PMID: 17317681; PubMed  
926 Central PMCID: PMCPMC1874605.
- 927 63. Engler C, Kandzia R, Marillonnet S. A one pot, one step, precision cloning method with high  
928 throughput capability. PLoS One. 2008;3(11):e3647. Epub 2008/11/06. doi:  
929 10.1371/journal.pone.0003647. PubMed PMID: 18985154; PubMed Central PMCID:  
930 PMCPMC2574415.
- 931 64. Lobstein J, Emrich CA, Jeans C, Faulkner M, Riggs P, Berkmen M. SHuffle, a novel Escherichia  
932 coli protein expression strain capable of correctly folding disulfide bonded proteins in its cytoplasm.  
933 Microb Cell Fact. 2012;11:56. Epub 2012/05/10. doi: 10.1186/1475-2859-11-56. PubMed PMID:  
934 22569138; PubMed Central PMCID: PMCPMC3526497.

- 935 65. Studier FW. Protein production by auto-induction in high density shaking cultures. *Protein*  
936 *Expr Purif.* 2005;41(1):207-34. Epub 2005/05/26. PubMed PMID: 15915565.
- 937 66. Vonrhein C, Flensburg C, Keller P, Sharff A, Smart O, Paciorek W, et al. Data processing and  
938 analysis with the autoPROC toolbox. *Acta Crystallogr D Biol Crystallogr.* 2011;67(Pt 4):293-302. Epub  
939 2011/04/05. doi: 10.1107/S0907444911007773. PubMed PMID: 21460447; PubMed Central PMCID:  
940 PMC3069744.
- 941 67. Winn MD, Ballard CC, Cowtan KD, Dodson EJ, Emsley P, Evans PR, et al. Overview of the CCP4  
942 suite and current developments. *Acta Crystallogr D Biol Crystallogr.* 2011;67(Pt 4):235-42. Epub  
943 2011/04/05. doi: 10.1107/S0907444910045749. PubMed PMID: 21460441; PubMed Central PMCID:  
944 PMC3069738.
- 945 68. McCoy AJ, Grosse-Kunstleve RW, Adams PD, Winn MD, Storoni LC, Read RJ. Phaser  
946 crystallographic software. *J Appl Crystallogr.* 2007;40(Pt 4):658-74. Epub 2007/08/01. doi:  
947 10.1107/S0021889807021206. PubMed PMID: 19461840; PubMed Central PMCID: PMC2483472.
- 948 69. Emsley P, Lohkamp B, Scott WG, Cowtan K. Features and development of Coot. *Acta*  
949 *Crystallogr D Biol Crystallogr.* 2010;66(Pt 4):486-501. Epub 2010/04/13. doi:  
950 10.1107/S0907444910007493. PubMed PMID: 20383002; PubMed Central PMCID: PMC2852313.
- 951 70. Murshudov GN, Skubak P, Lebedev AA, Pannu NS, Steiner RA, Nicholls RA, et al. REFMAC5 for  
952 the refinement of macromolecular crystal structures. *Acta Crystallogr D Biol Crystallogr.* 2011;67(Pt  
953 4):355-67. Epub 2011/04/05. doi: 10.1107/S0907444911001314. PubMed PMID: 21460454; PubMed  
954 Central PMCID: PMC3069751.
- 955 71. Chen VB, Arendall WB, 3rd, Headd JJ, Keedy DA, Immormino RM, Kapral GJ, et al. MolProbity:  
956 all-atom structure validation for macromolecular crystallography. *Acta Crystallogr D Biol Crystallogr.*  
957 2010;66(Pt 1):12-21. doi: 10.1107/S0907444909042073. PubMed PMID: 20057044; PubMed Central  
958 PMCID: PMC2803126.
- 959 72. Myszka DG. Improving biosensor analysis. *J Mol Recognit.* 1999;12(5):279-84. Epub  
960 1999/11/11. doi: 10.1002/(SICI)1099-1352(199909/10)12:5<279::AID-JMR473>3.0.CO;2-3. PubMed  
961 PMID: 10556875.
- 962 73. Wickham H. *ggplot2: Elegant Graphics for Data Analysis*: Springer-Verlag New York; 2016.  
963 Available from: <https://ggplot2.tidyverse.org>.
- 964 74. Sievers F, Higgins DG. Clustal Omega, accurate alignment of very large numbers of sequences.  
965 *Methods in molecular biology* (Clifton, NJ). 2014;1079:105-16. Epub 2013/10/31. doi: 10.1007/978-1-  
966 62703-646-7\_6. PubMed PMID: 24170397.
- 967 75. Tamura K, Nei M. Estimation of the number of nucleotide substitutions in the control region  
968 of mitochondrial DNA in humans and chimpanzees. *Mol Biol Evol.* 1993;10(3):512-26. Epub  
969 1993/05/01. doi: 10.1093/oxfordjournals.molbev.a040023. PubMed PMID: 8336541.
- 970 76. Kumar S, Stecher G, Li M, Knyaz C, Tamura K. MEGA X: Molecular Evolutionary Genetics  
971 Analysis across Computing Platforms. *Mol Biol Evol.* 2018;35(6):1547-9. Epub 2018/05/04. doi:  
972 10.1093/molbev/msy096. PubMed PMID: 29722887; PubMed Central PMCID: PMC5967553.
- 973 77. Letunic I, Bork P. Interactive Tree Of Life (iTOL) v4: recent updates and new developments.  
974 *Nucleic Acids Research.* 2019;47(W1):W256-W9. doi: 10.1093/nar/gkz239.
- 975 78. Ho J, Tumkaya T, Aryal S, Choi H, Claridge-Chang A. Moving beyond P values: data analysis  
976 with estimation graphics. *Nature Methods.* 2019;16(7):565-6. doi: 10.1038/s41592-019-0470-3.
- 977 79. Besthr [Internet]. 2019.
- 978 80. nlme: Linear and Nonlinear Mixed Effects Models [Internet]. 2019. Available from:  
979 <https://cran.r-project.org/web/packages/nlme/index.html>.
- 980 81. Lenth RV. Least-Squares Means: The R Package lsmeans. 2016. 2016;69(1):33. Epub 2016-01-  
981 29. doi: 10.18637/jss.v069.i01.

982
